# Supplementary material for: New Ophiobolin Derivatives from the Marine Fungus Aspergillus flocculosus and Their Cytotoxicities against Cancer Cells
Source: PubMed Central journal article supplement (PMC6628216; doi:10.3390/md17060346), 2019-06-11
Supplement: marinedrugs-17-00346-s001.pdf [file marinedrugs-17-00346-s001.pdf]

## Supplementary data

# New Ophiobolin Derivatives from the Marine Fungus *Aspergillus flocculosus* and Their Cytotoxicities against Cancer Cells

Byeoung-Kyu Choi <sup>1,2</sup>, Phan Thi Hoai Trinh <sup>3,4</sup>, Hwa-Sun Lee <sup>2</sup>, Byeong-Woo Choi <sup>2</sup>, Jong Soon Kang <sup>5</sup>, Ngo Thi Duy Ngoc <sup>3</sup>, Tran Thi Thanh Van <sup>3,4</sup> and Hee Jae Shin <sup>1,2,\*</sup>

<sup>1</sup> Department of Marine Biotechnology, University of Science and Technology (UST), 217 Gajungro, Yuseong-gu, Daejeon 34113, Korea; choibk4404@kiost.ac

<sup>2</sup> Marine Natural Products Chemistry Laboratory, Korea Institute of Ocean Science and Technology, 385 Haeyang-ro, Yeongdo-gu, Busan 49111, Korea; hwasunlee@kiost.ac (H.-S.L.); choibw0924@gmail.com (B.-W.C.)

<sup>3</sup> Nhatrang Institute of Technology Research and Application, Vietnam Academy of Science and Technology, 02 Hung Vuong, Nha Trang 650000, Vietnam; phanhoaitrinh84@gmail.com (P.T.H.T.); ngoduynhoc@nitra.vast.vn (N.T.D.N); tranthanhvan@nitra.vast.vn (T.T.T.V.)

<sup>4</sup> Graduate University of Science and Technology, Vietnam Academy of Science and Technology, 18 Hoang Quoc Viet, Cau Giay, Ha Noi 100000, Vietnam

<sup>5</sup> Laboratory Animal Resource Center, Korea Research Institute of Bioscience and Biotechnology, 30 Yeongudanjiro, Cheongju 28116, Korea; kanjon@kribb.re.kr

\* Correspondence: shinhj@kiost.ac.kr; Tel.: +82-51-664-3341; Fax: +82-51-664-3340

# Contents

|                                                                                                                  |    |
|------------------------------------------------------------------------------------------------------------------|----|
| Figure S1. HRESIMS data of 14,15-dehydro-6- <i>epi</i> -ophiobolin K (1). -----                                  | 4  |
| Figure S2. <sup>1</sup> H NMR spectrum of 14,15-dehydro-6- <i>epi</i> -ophiobolin K (1). -----                   | 5  |
| Figure S3. <sup>13</sup> C NMR spectrum of 14,15-dehydro-6- <i>epi</i> -ophiobolin K (1). -----                  | 6  |
| Figure S4. <sup>1</sup> H- <sup>1</sup> H COSY spectrum of 14,15-dehydro-6- <i>epi</i> -ophiobolin K (1). -----  | 7  |
| Figure S5. HSQC spectrum of 14,15-dehydro-6- <i>epi</i> -ophiobolin K (1). -----                                 | 8  |
| Figure S6. HMBC spectrum of 14,15-dehydro-6- <i>epi</i> -ophiobolin K (1). -----                                 | 9  |
| Figure S7. NOESY spectrum of 14,15-dehydro-6- <i>epi</i> -ophiobolin K (1). -----                                | 10 |
| Figure S8. HRESIMS data of 14,15-dehydro-ophiobolin K (2). -----                                                 | 11 |
| Figure S9. <sup>1</sup> H NMR spectrum of 14,15-dehydro-ophiobolin K (2). -----                                  | 12 |
| Figure S10. <sup>13</sup> C NMR spectrum of 14,15-dehydro-ophiobolin K (2). -----                                | 13 |
| Figure S11. <sup>1</sup> H- <sup>1</sup> H COSY spectrum of 14,15-dehydro-ophiobolin K (2). -----                | 14 |
| Figure S12. HSQC spectrum of 14,15-dehydro-ophiobolin K (2). -----                                               | 15 |
| Figure S13. HMBC spectrum of 14,15-dehydro-ophiobolin K (2). -----                                               | 16 |
| Figure S14. NOESY spectrum of 14,15-dehydro-ophiobolin K (2). -----                                              | 17 |
| Figure S15. HRESIMS data of 14,15-dehydro-6- <i>epi</i> -ophiobolin G (3). -----                                 | 18 |
| Figure S16. <sup>1</sup> H NMR spectrum of 14,15-dehydro-6- <i>epi</i> -ophiobolin G (3). -----                  | 19 |
| Figure S17. <sup>13</sup> C NMR spectrum of 14,15-dehydro-6- <i>epi</i> -ophiobolin G (3). -----                 | 20 |
| Figure S18. <sup>1</sup> H- <sup>1</sup> H COSY spectrum of 14,15-dehydro-6- <i>epi</i> -ophiobolin G (3). ----- | 21 |
| Figure S19. HSQC spectrum of 14,15-dehydro-6- <i>epi</i> -ophiobolin G (3). -----                                | 22 |
| Figure S20. HMBC spectrum of 14,15-dehydro-6- <i>epi</i> -ophiobolin G (3). -----                                | 23 |
| Figure S21. NOESY spectrum of 14,15-dehydro-6- <i>epi</i> -ophiobolin G (3). -----                               | 24 |
| Figure S22. HRESIMS data of 14,15-dehydro-ophiobolin G (4). -----                                                | 25 |
| Figure S23. <sup>1</sup> H NMR spectrum of 14,15-dehydro-ophiobolin G (4). -----                                 | 26 |
| Figure S24. <sup>13</sup> C NMR spectrum of 14,15-dehydro-ophiobolin G (4). -----                                | 27 |
| Figure S25. <sup>1</sup> H- <sup>1</sup> H COSY spectrum of 14,15-dehydro-ophiobolin G (4). -----                | 28 |
| Figure S26. HSQC spectrum of 14,15-dehydro-ophiobolin G (4). -----                                               | 29 |
| Figure S27. HMBC spectrum of 14,15-dehydro-ophiobolin G (4). -----                                               | 30 |
| Figure S28. NOESY spectrum of 14,15-dehydro-ophiobolin G (4). -----                                              | 31 |

|                                                                                                          |    |
|----------------------------------------------------------------------------------------------------------|----|
| Figure S29. HRESIMS data of 14,15-dehydro-(Z)-14-ophiobolin G (5). -----                                 | 32 |
| Figure S30. <sup>1</sup> H NMR spectrum of 14,15-dehydro-(Z)-14-ophiobolin G (5). -----                  | 33 |
| Figure S31. <sup>13</sup> C NMR spectrum of 14,15-dehydro-(Z)-14-ophiobolin G (5). -----                 | 34 |
| Figure S32. <sup>1</sup> H- <sup>1</sup> H COSY spectrum of 14,15-dehydro-(Z)-14-ophiobolin G (5). ----- | 35 |
| Figure S33. HSQC spectrum of 14,15-dehydro-(Z)-14-ophiobolin G (5). -----                                | 36 |
| Figure S34. HMBC spectrum of 14,15-dehydro-(Z)-14-ophiobolin G (5). -----                                | 37 |
| Figure S35. NOESY spectrum of 14,15-dehydro-(Z)-14-ophiobolin G (5). -----                               | 38 |
| Figure S36. LRMS data of 6- <i>epi</i> -ophiobolin C (6). -----                                          | 39 |
| Figure S37. <sup>1</sup> H NMR spectrum of 6- <i>epi</i> -ophiobolin C (6). -----                        | 39 |
| Figure S38. LRMS data of Ophiobolin C (7). -----                                                         | 40 |
| Figure S39. <sup>1</sup> H NMR spectrum of Ophiobolin C (7). -----                                       | 40 |
| Figure S40. LRMS data of 6- <i>epi</i> -ophiobolin N (8). -----                                          | 41 |
| Figure S41. <sup>1</sup> H NMR spectrum of 6- <i>epi</i> -ophiobolin N (8). -----                        | 41 |
| Figure S42. LRMS data of Ophiobolin N (9). -----                                                         | 42 |
| Figure S43. <sup>1</sup> H NMR spectrum of Ophiobolin N (9). -----                                       | 42 |

### Elemental Composition Report

Single Mass Analysis  
Tolerance = 5.0 PPM / DBE: min = -1.5, max = 50.0  
Element prediction: Off  
Number of isotope peaks used for i-FIT = 3

Monoisotopic Mass, Even Electron Ions  
41 formula(e) evaluated with 1 results within limits (all results (up to 1000) for each mass)

Elements Used:

C: 1-30 H: 1-50 O: 1-5 Na: 0-1

Minimum: -1.5

Maximum: 500.0 5.0 50.0

| Mass     | Calc. Mass | mDa  | PPM  | DBE | i-FIT | Norm | Conf(%) | Formula                                           |
|----------|------------|------|------|-----|-------|------|---------|---------------------------------------------------|
| 405.2405 | 405.2406   | -0.1 | -0.2 | 8.5 | 953.0 | n/a  | n/a     | C <sub>25</sub> H <sub>34</sub> O <sub>3</sub> Na |

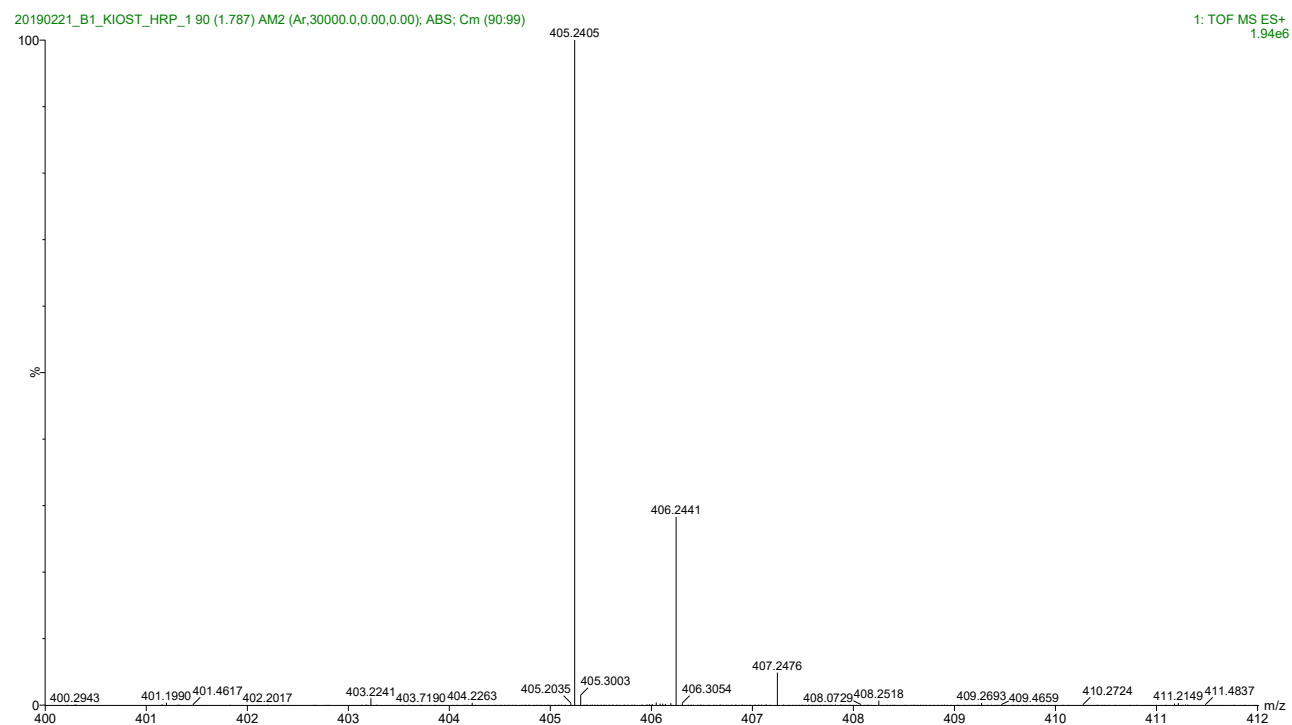

Figure S1. HRESIMS data of 14,15-dehydro-6-epi-ophiobolin K (1).

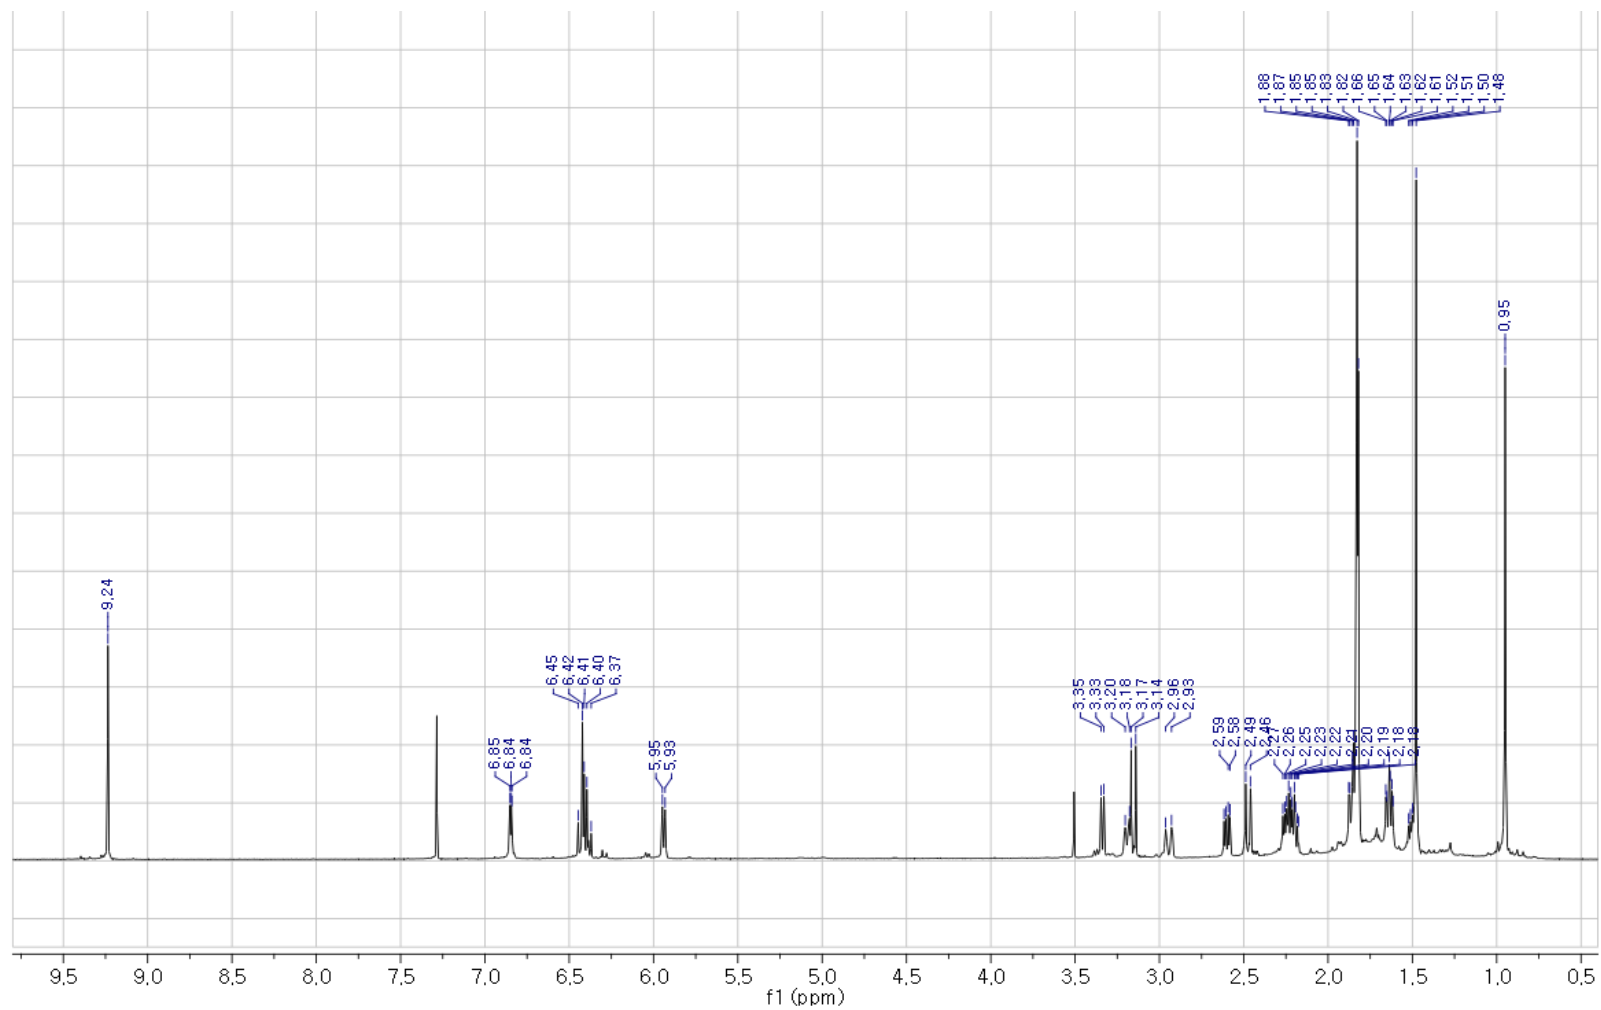

Figure S2.  $^1\text{H}$  NMR spectrum of 14,15-dehydro-6-*epi*-ophiobolin K (**1**).

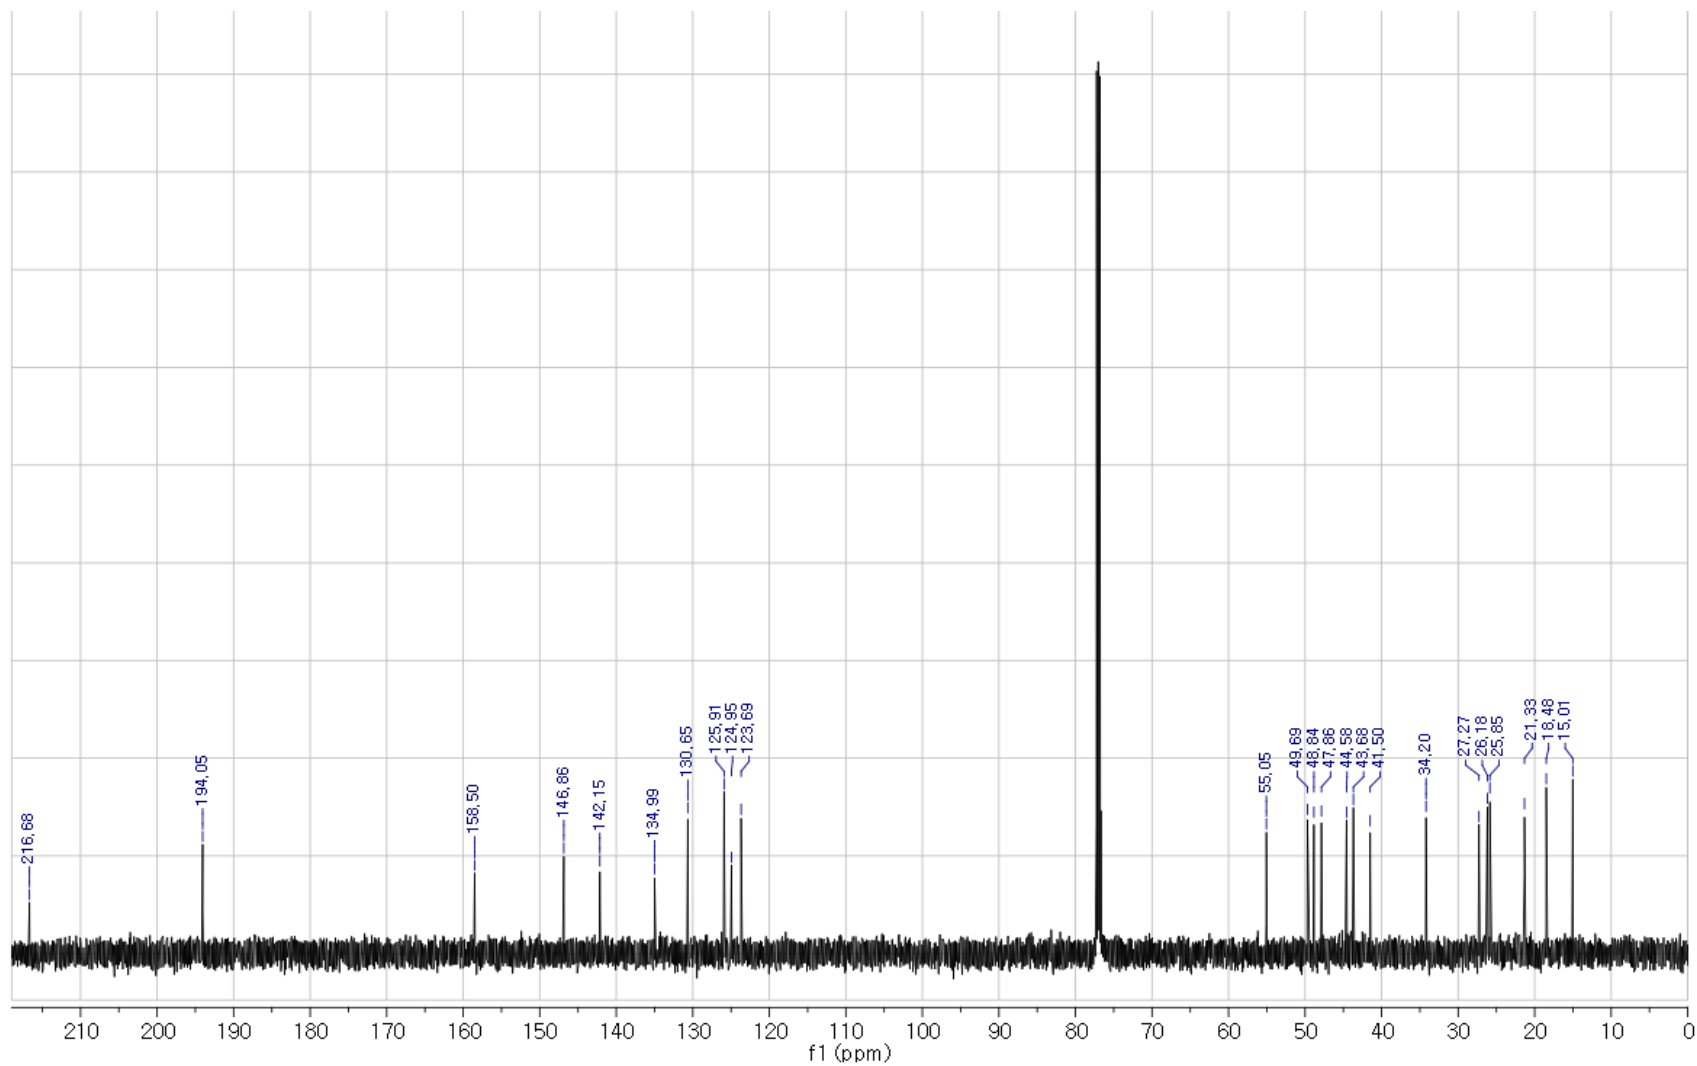

Figure S3. <sup>13</sup>C NMR spectrum of 14,15-dehydro-6-*epi*-ophiobolin K (**1**).

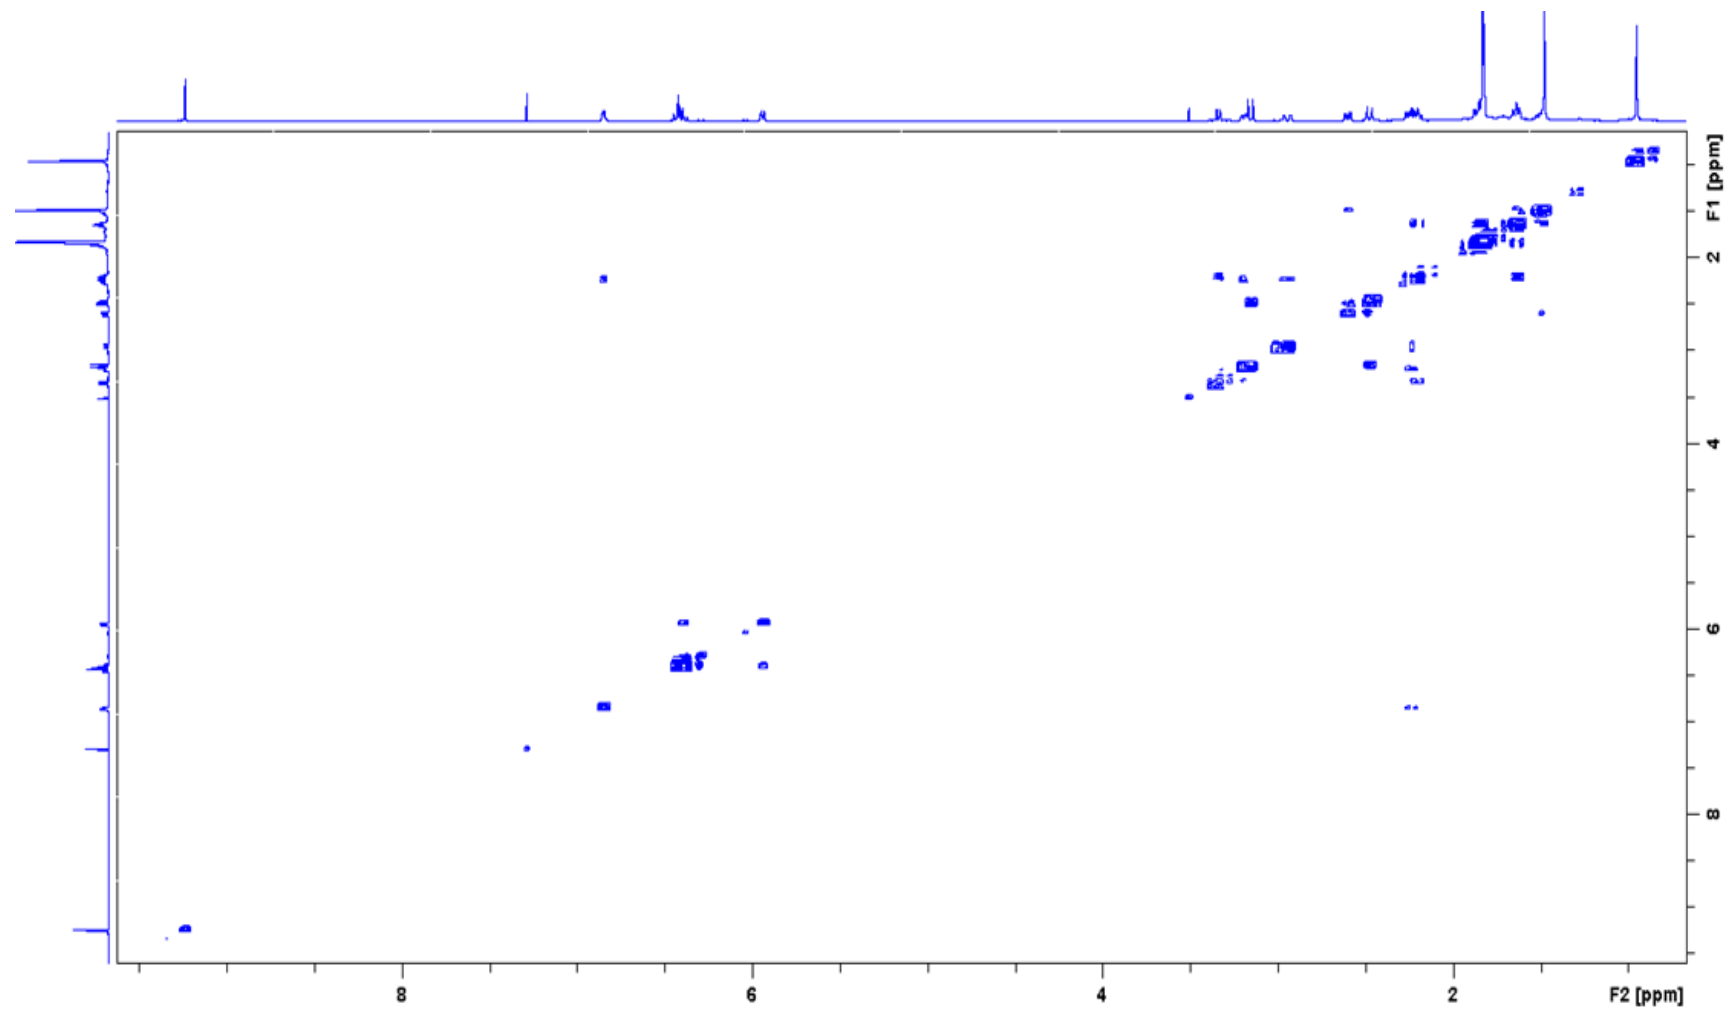

Figure S4.  $^1\text{H}$ - $^1\text{H}$  COSY spectrum of 14,15-dehydro-6-*epi*-ophiobolin K (**1**).

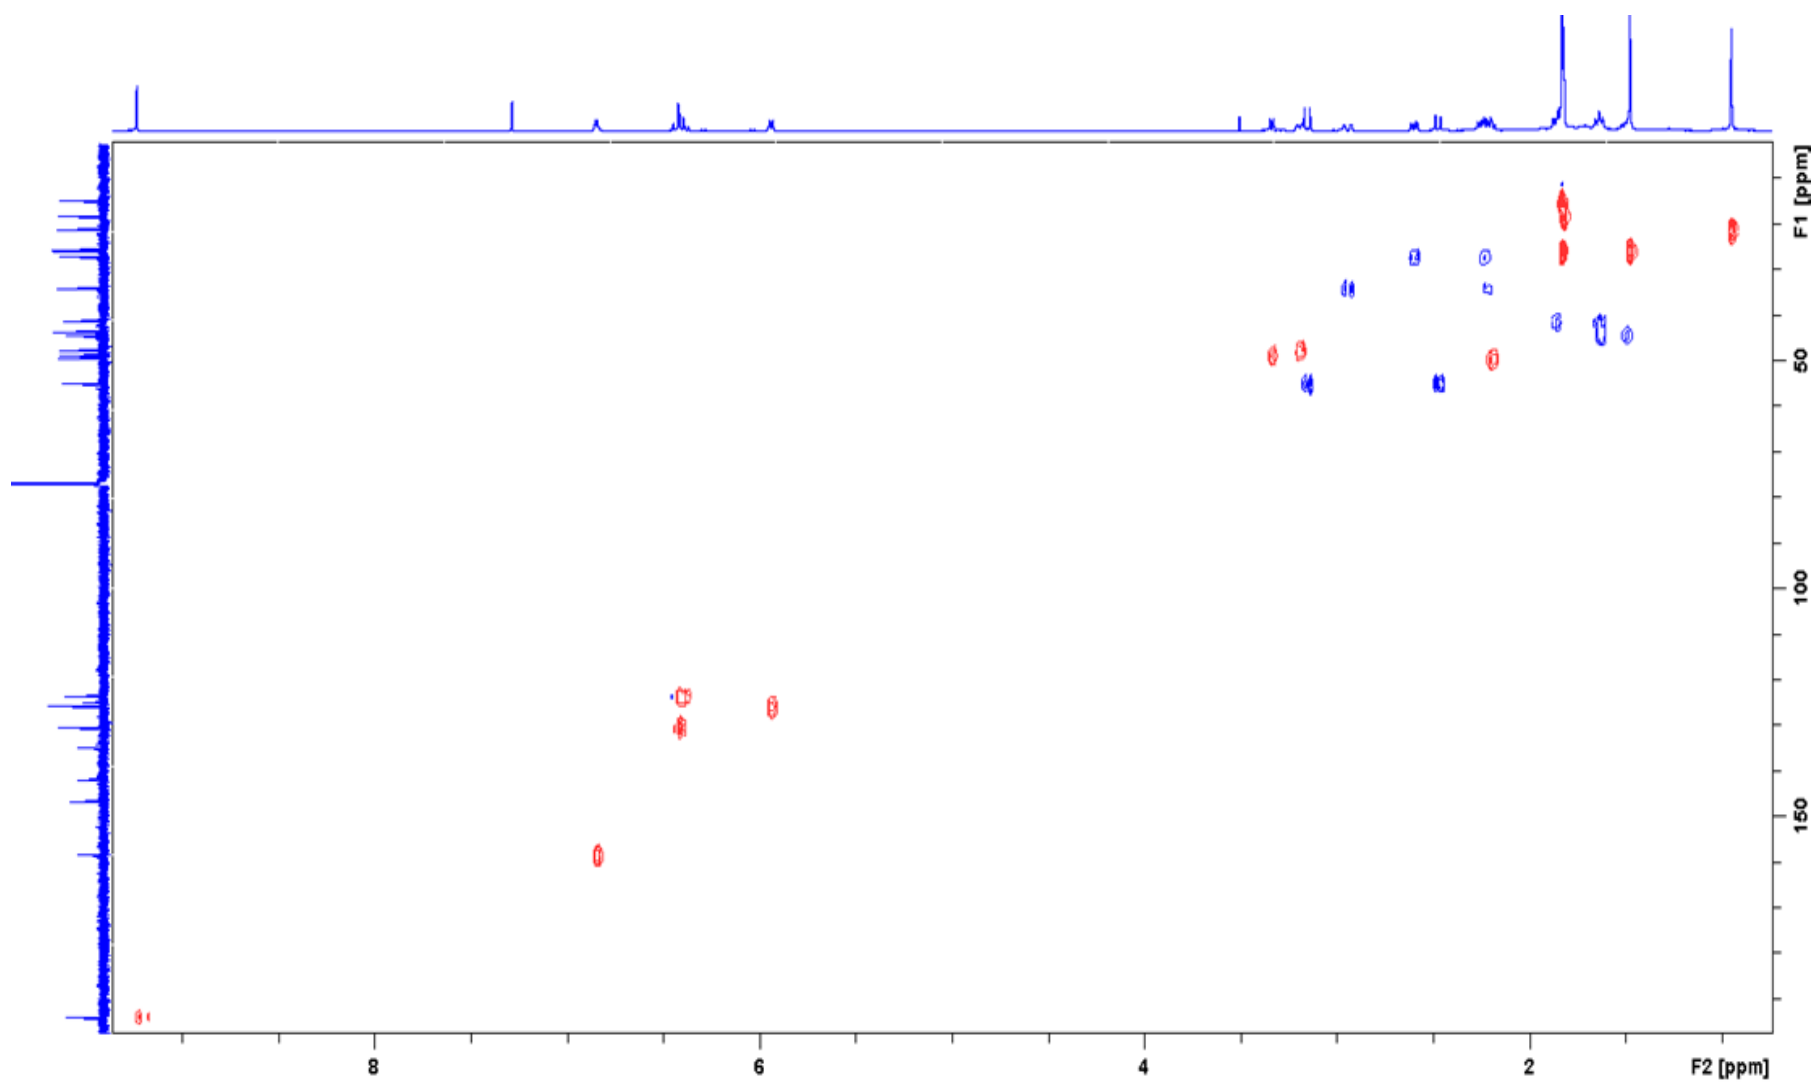

Figure S5. HSQC spectrum of 14,15-dehydro-6-*epi*-ophiobolin K (**1**).



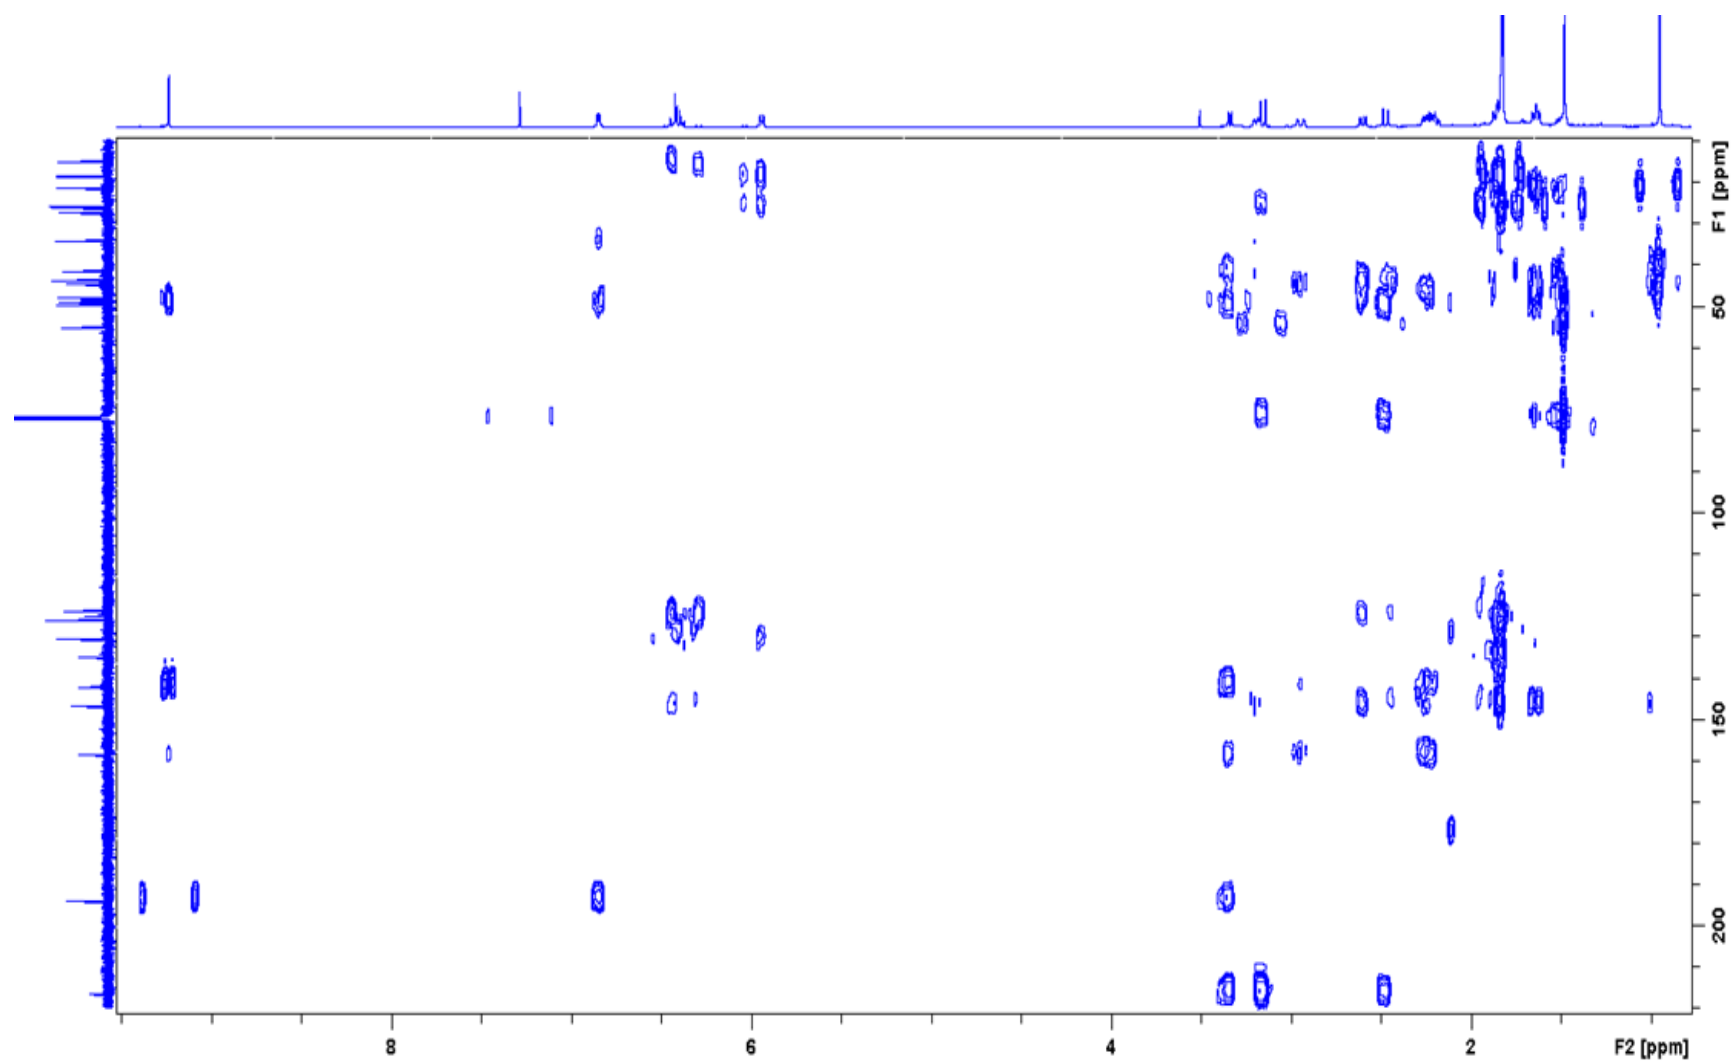

Figure S6. HMBC spectrum of 14,15-dehydro-6-*epi*-ophiobolin K (**1**).

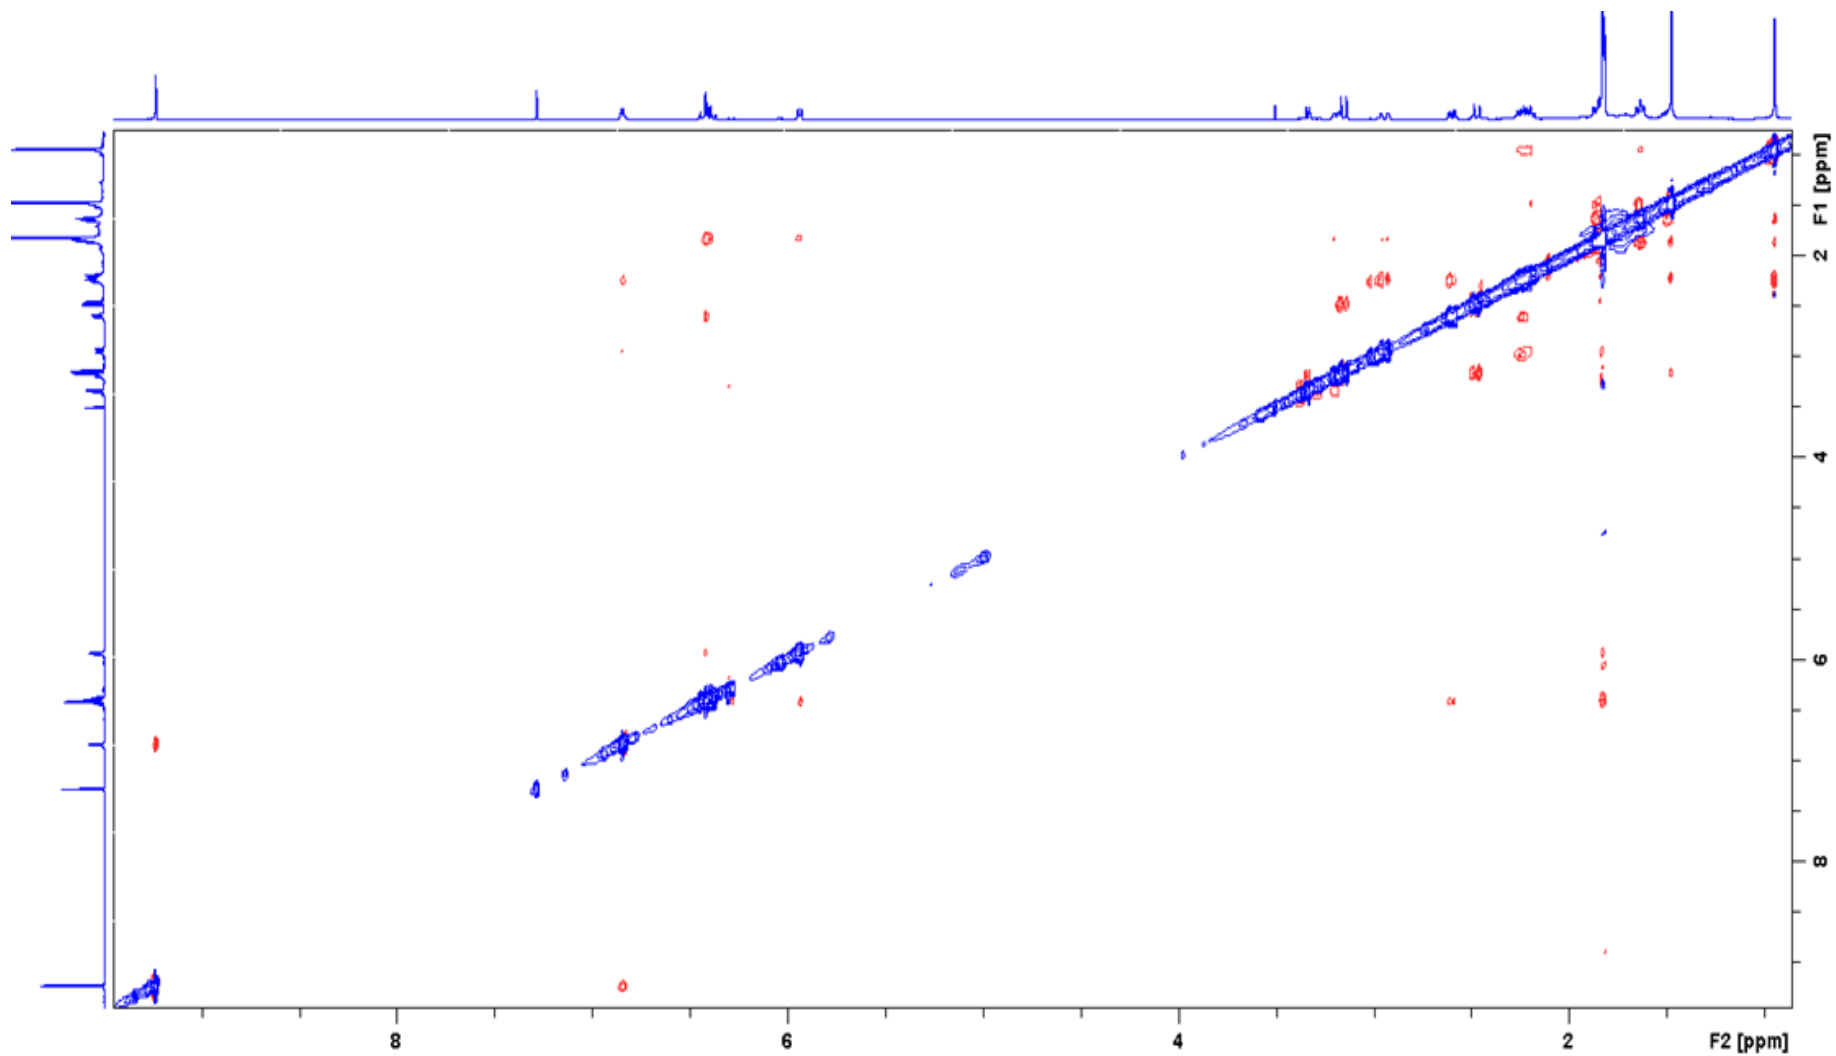

Figure S7. NOESY spectrum of 14,15-dehydro-6-*epi*-ophiobolin K (**1**).

## Elemental Composition Report

Single Mass Analysis

Tolerance = 5.0 PPM / DBE: min = -1.5, max = 50.0

Element prediction: Off

Number of isotope peaks used for i-FIT = 3

Monoisotopic Mass, Even Electron Ions

41 formula(e) evaluated with 1 results within limits (all results (up to 1000) for each mass)

Elements Used:

C: 1-30 H: 1-50 O: 1-5 Na: 0-1

Minimum:

Maximum: 500.0 5.0 -1.5

| Mass     | Calc. Mass | mDa  | PPM  | DBE | i-FIT  | Norm | Conf(%) | Formula                                           |
|----------|------------|------|------|-----|--------|------|---------|---------------------------------------------------|
| 405.2404 | 405.2406   | -0.2 | -0.5 | 8.5 | 1146.9 | n/a  | n/a     | C <sub>25</sub> H <sub>34</sub> O <sub>3</sub> Na |

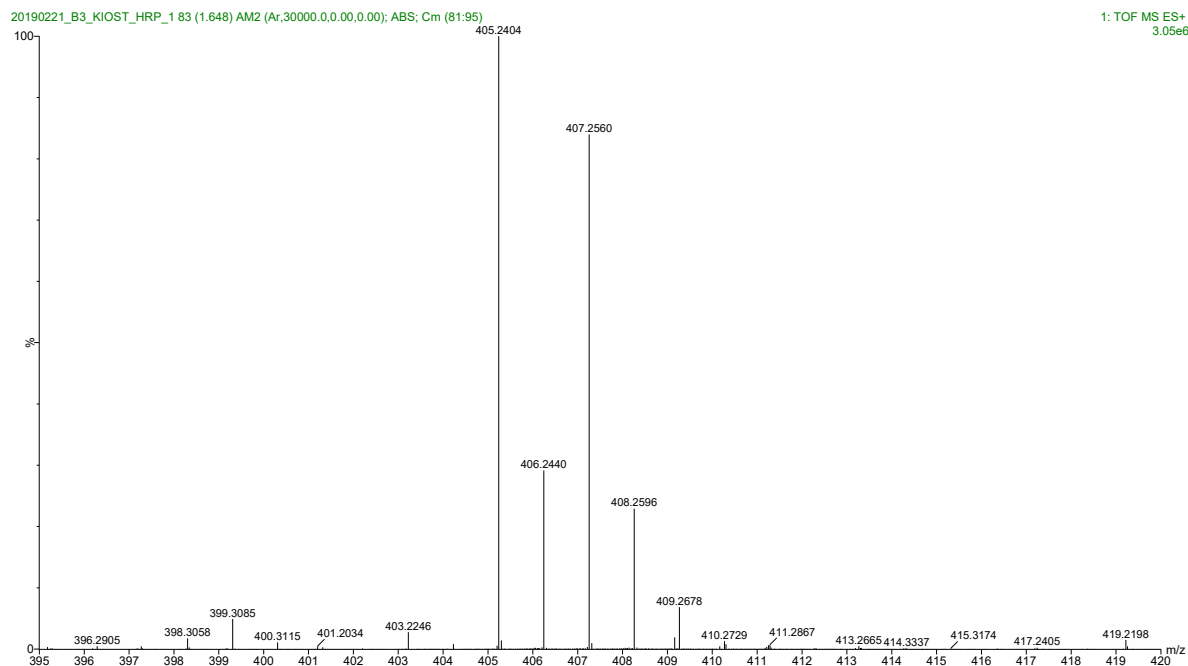

Figure S8. HRESIMS data of 14,15-dehydro-ophiobolin K (2).

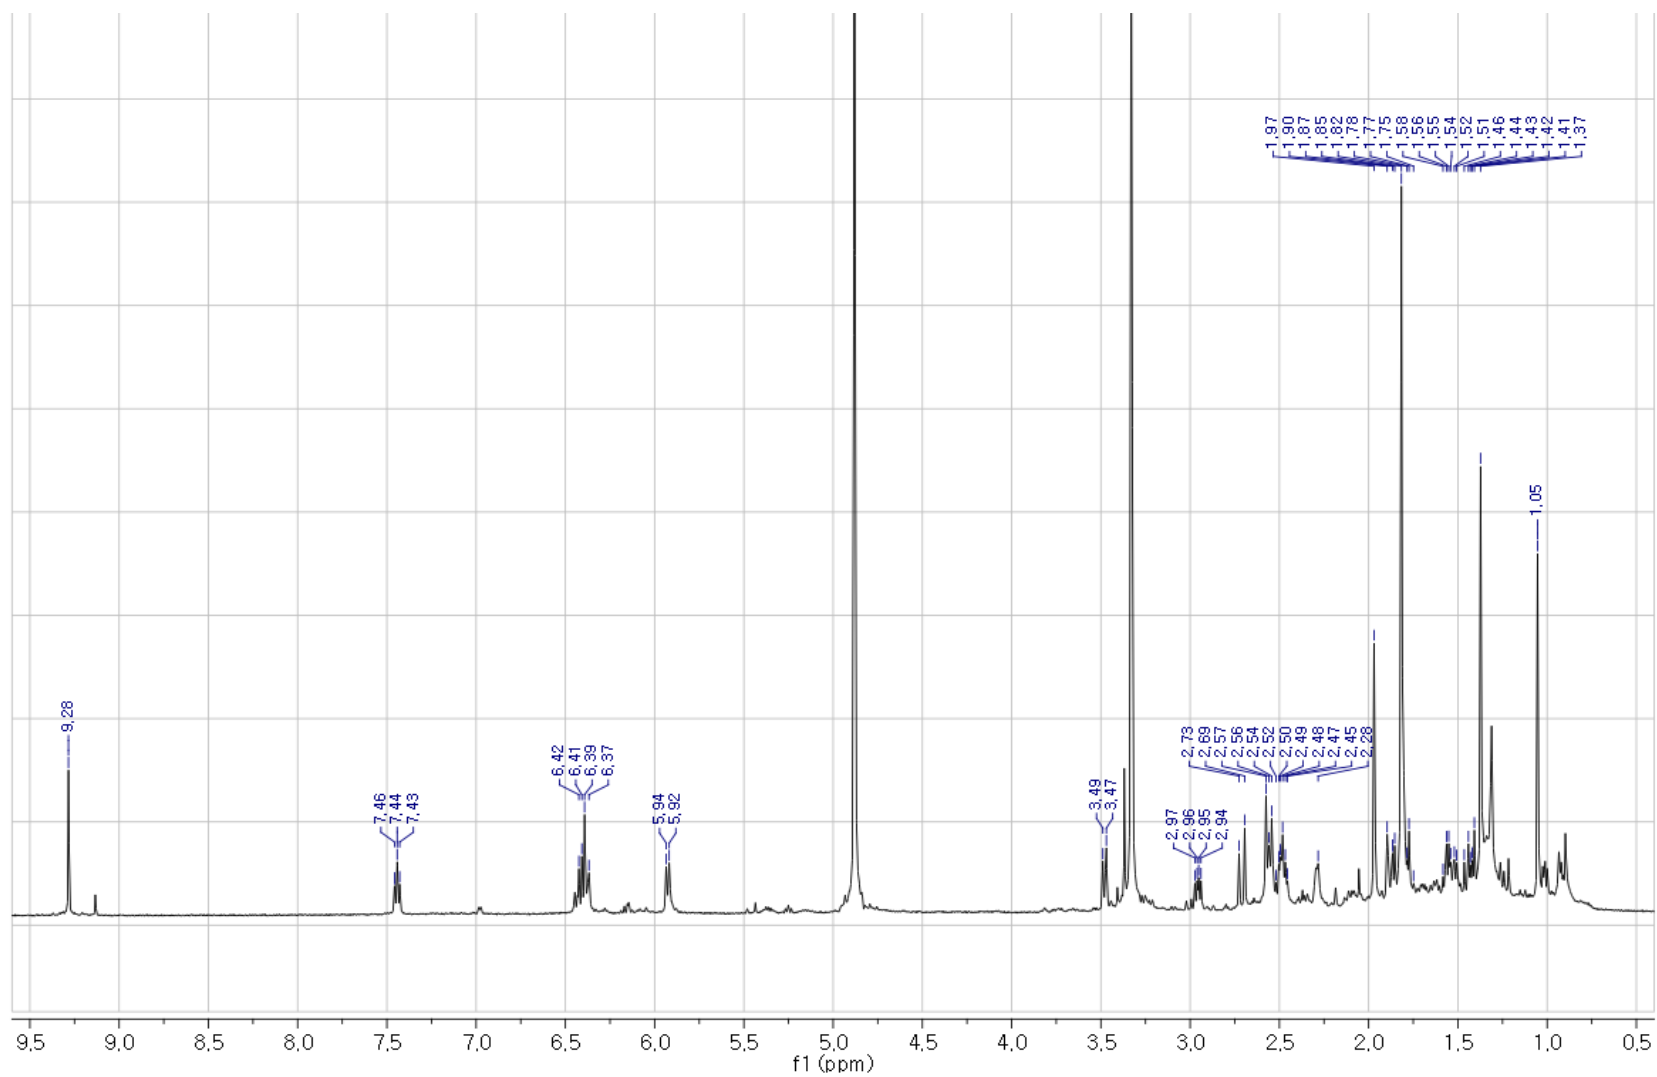

Figure S9.  $^1\text{H}$  NMR spectrum of 14,15-dehydro-ophiobolin K (**2**).

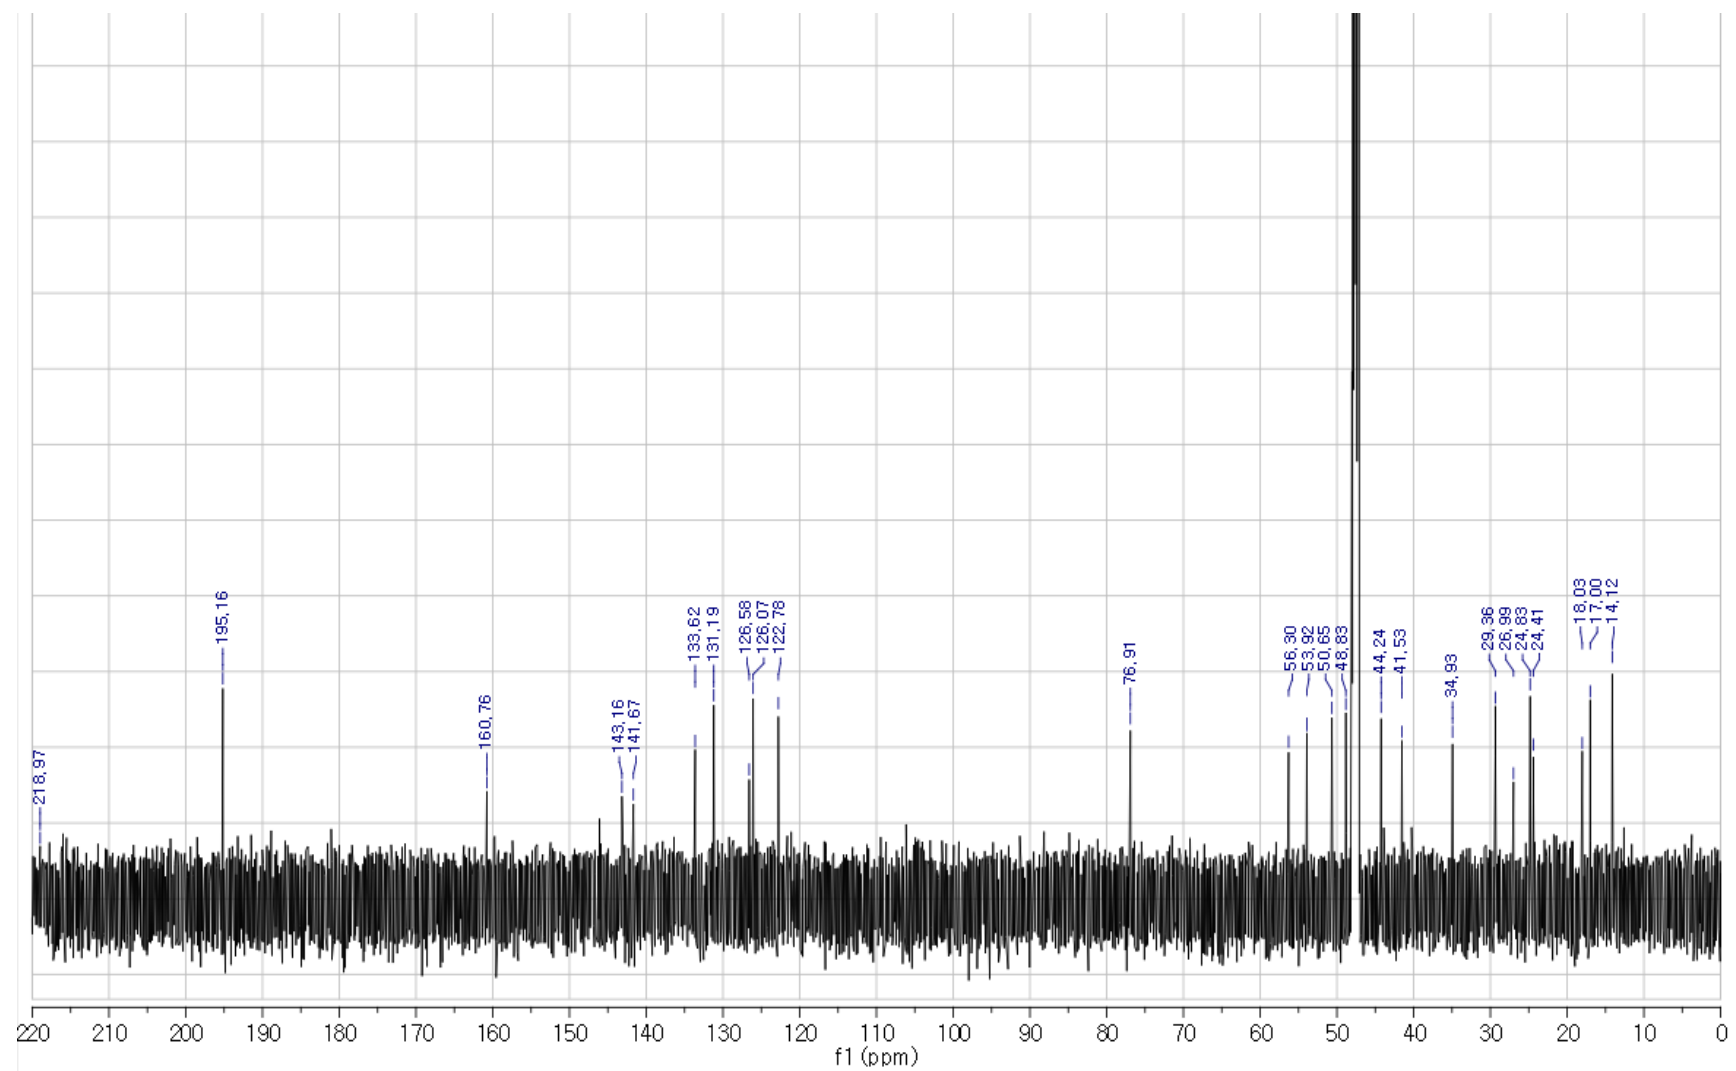

Figure S10. <sup>13</sup>C NMR spectrum of 14,15-dehydro-ophiobolin K (2).

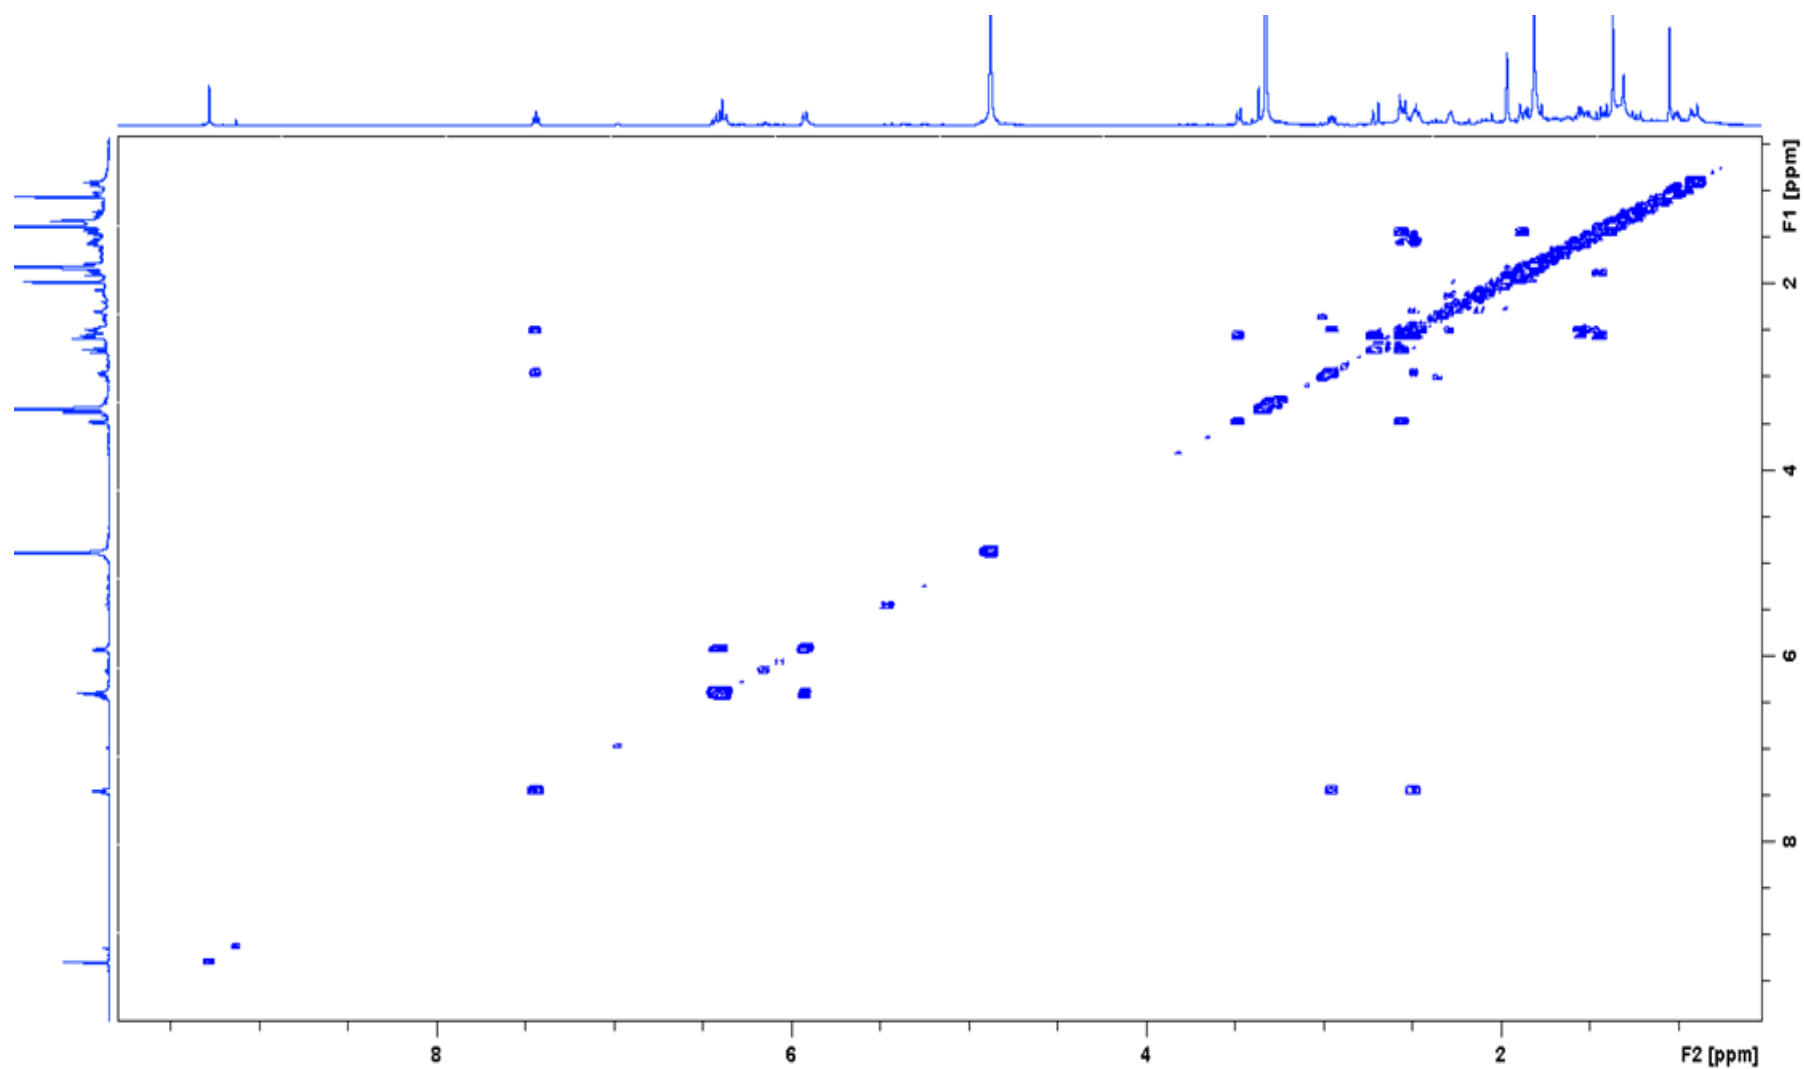

Figure S11.  $^1\text{H}$ - $^1\text{H}$  COSY spectrum of 14,15-dehydro-ophiobolin K (2).

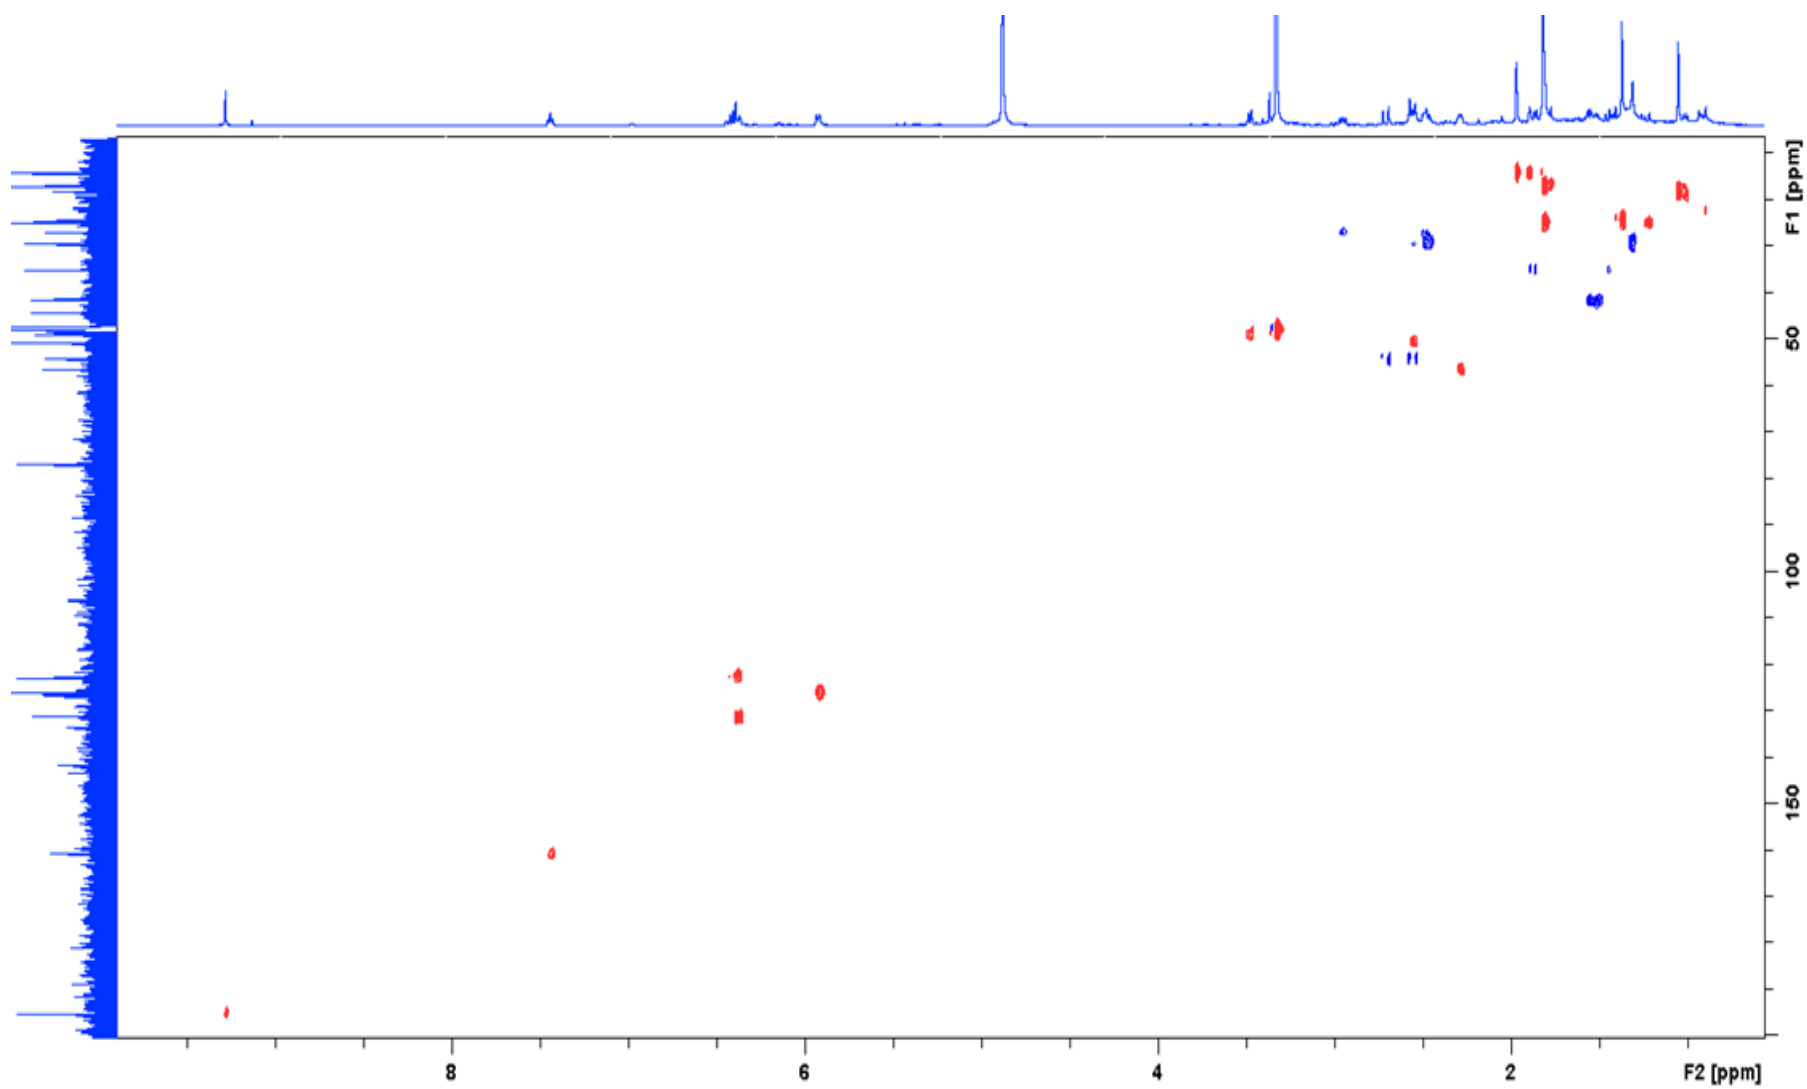

Figure S12. HSQC spectrum of 14,15-dehydro-ophiobolin K (2).

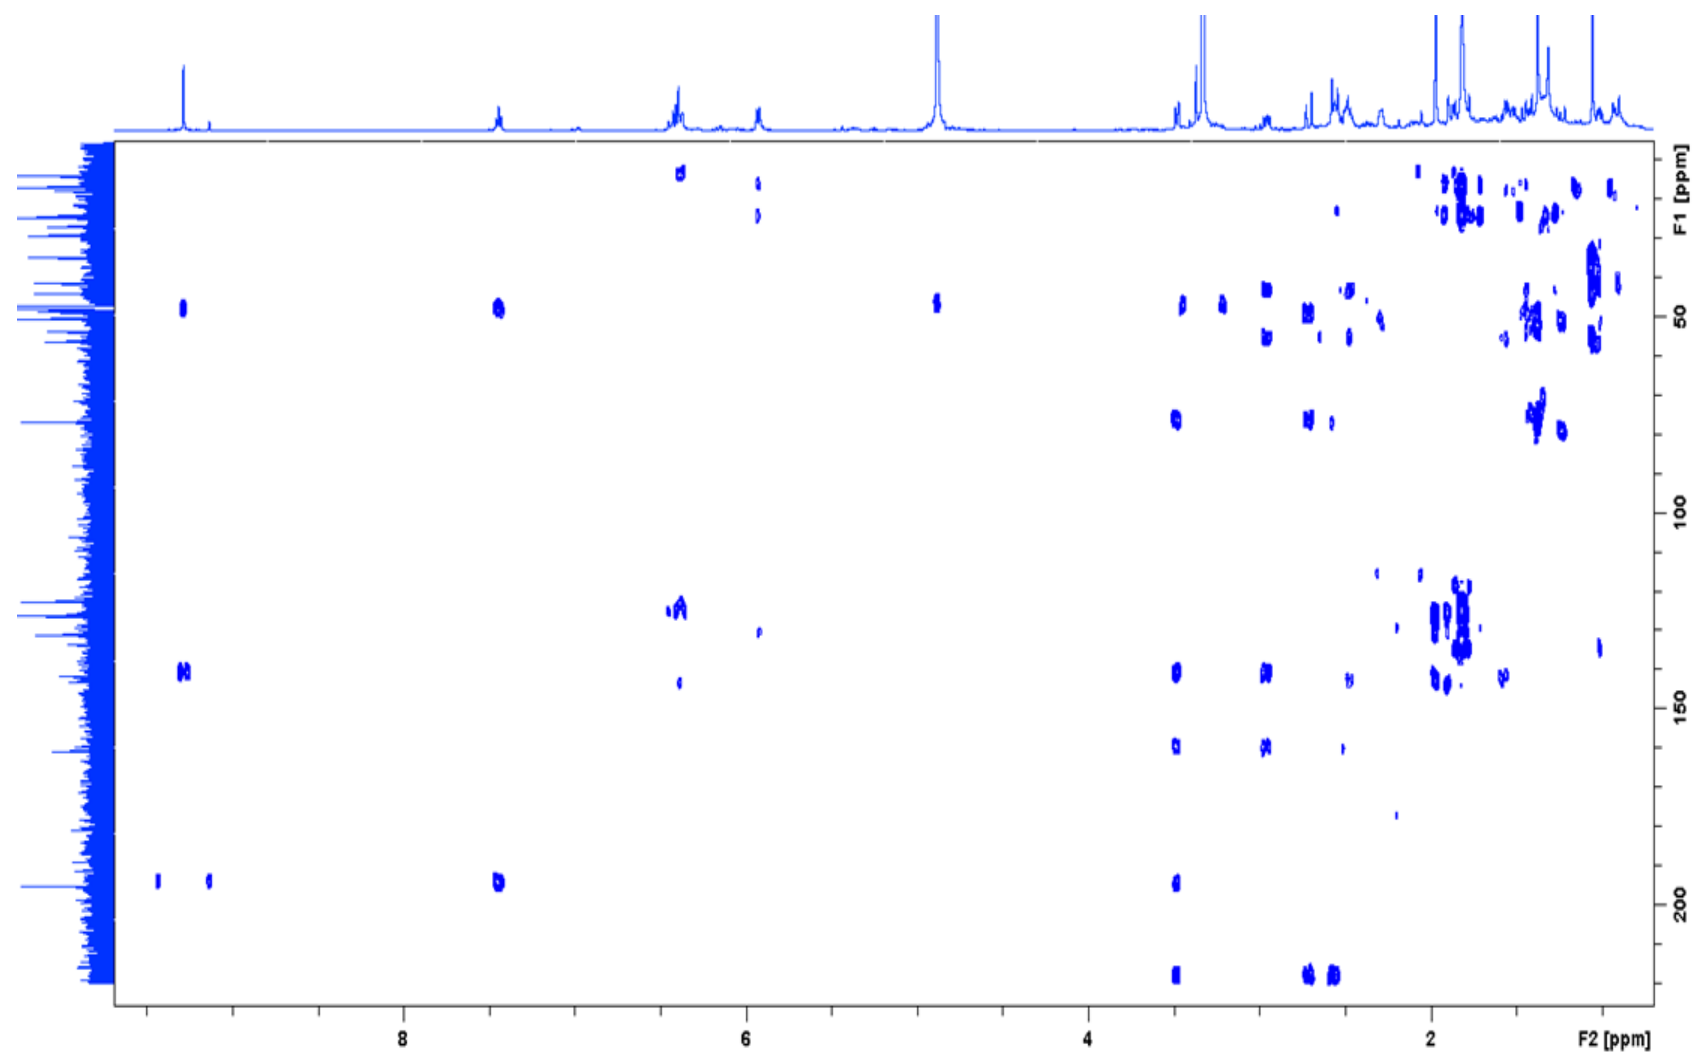

Figure S13. HMBC spectrum of 14,15-dehydro-ophiobolin K (2).



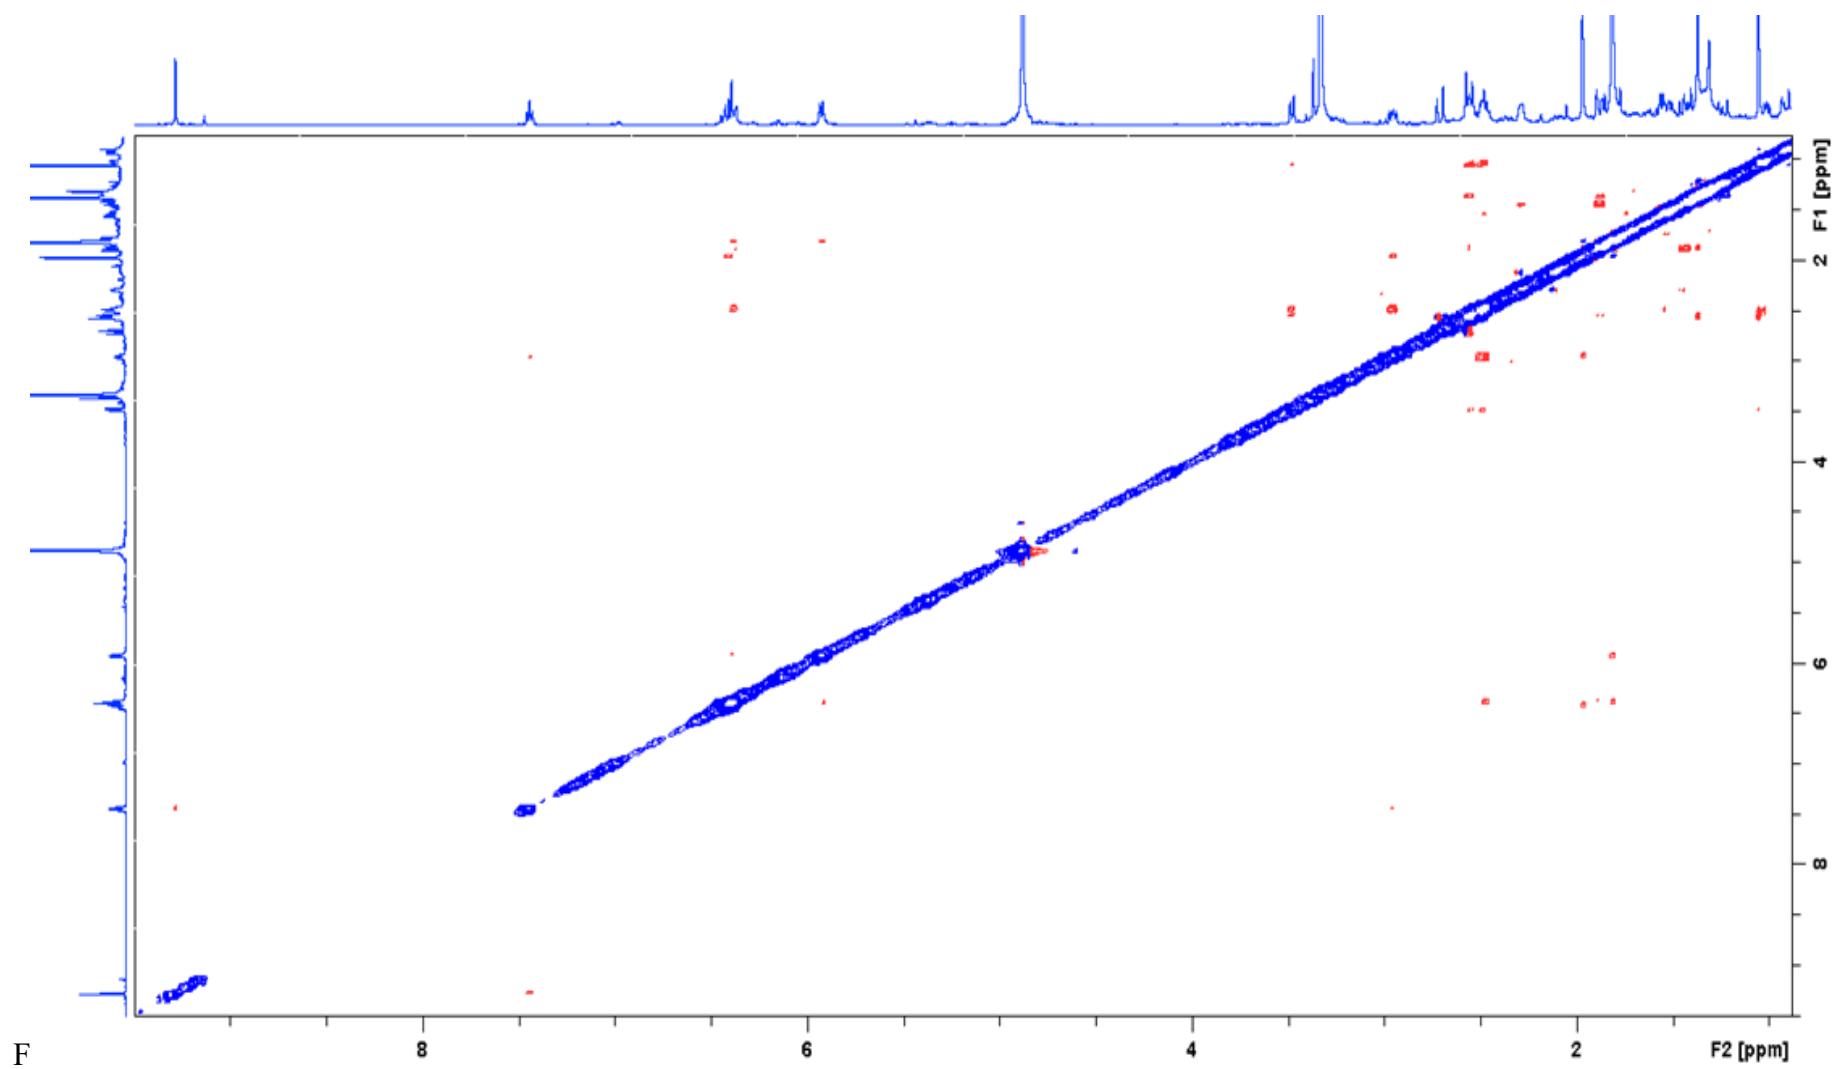

Figure S14. NOESY spectrum of 14,15-dehydro-ophiobolin K (2).

### Elemental Composition Report

Single Mass Analysis  
Tolerance = 5.0 PPM / DBE: min = -1.5, max = 50.0  
Element prediction: Off  
Number of isotope peaks used for i-FIT = 3

Monoisotopic Mass, Even Electron Ions  
82 formula(e) evaluated with 1 results within limits (all results (up to 1000) for each mass)

Elements Used:

C: 1-55 H: 1-80 O: 1-10 Na: 0-1

Minimum: -1.5

Maximum: 500.0 5.0 50.0

| Mass     | Calc. Mass | mDa | PPM | DBE | i-FIT  | Norm | Conf(%) | Formula                                           |
|----------|------------|-----|-----|-----|--------|------|---------|---------------------------------------------------|
| 387.2301 | 387.2300   | 0.1 | 0.3 | 9.5 | 1107.4 | n/a  | n/a     | C <sub>25</sub> H <sub>32</sub> O <sub>2</sub> Na |

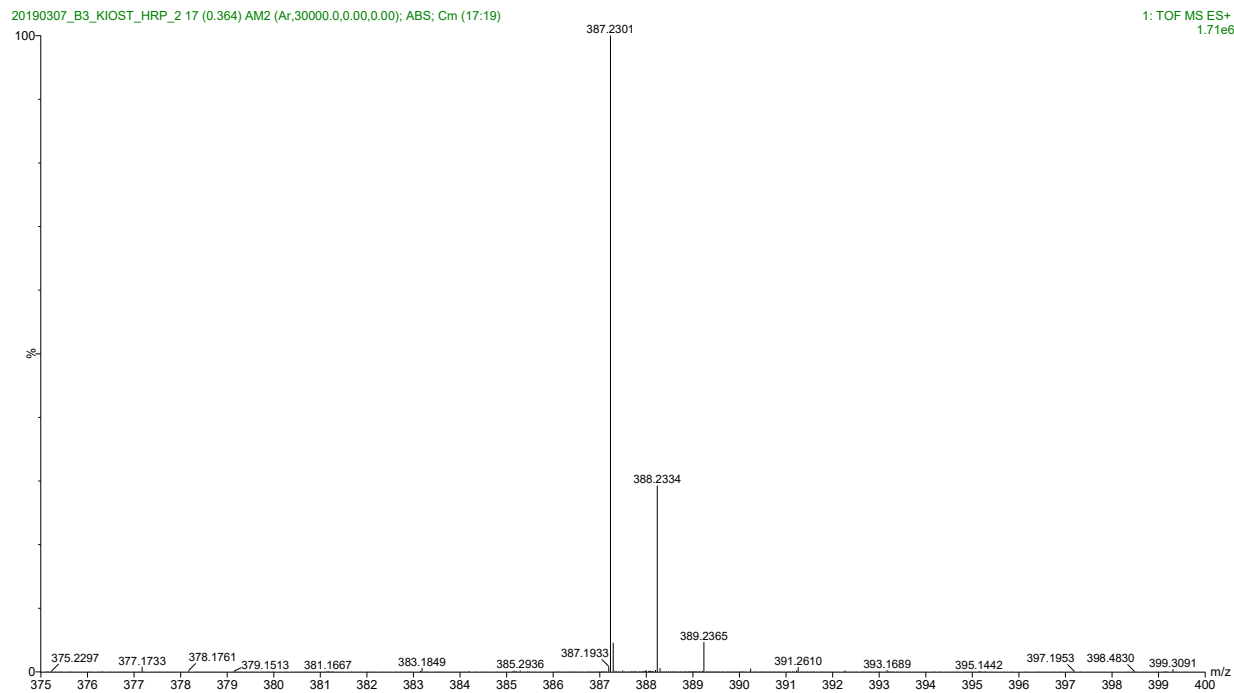

Figure S15. HRESIMS data of 14,15-dehydro-6-*epi*-ophiobolin G (**3**).

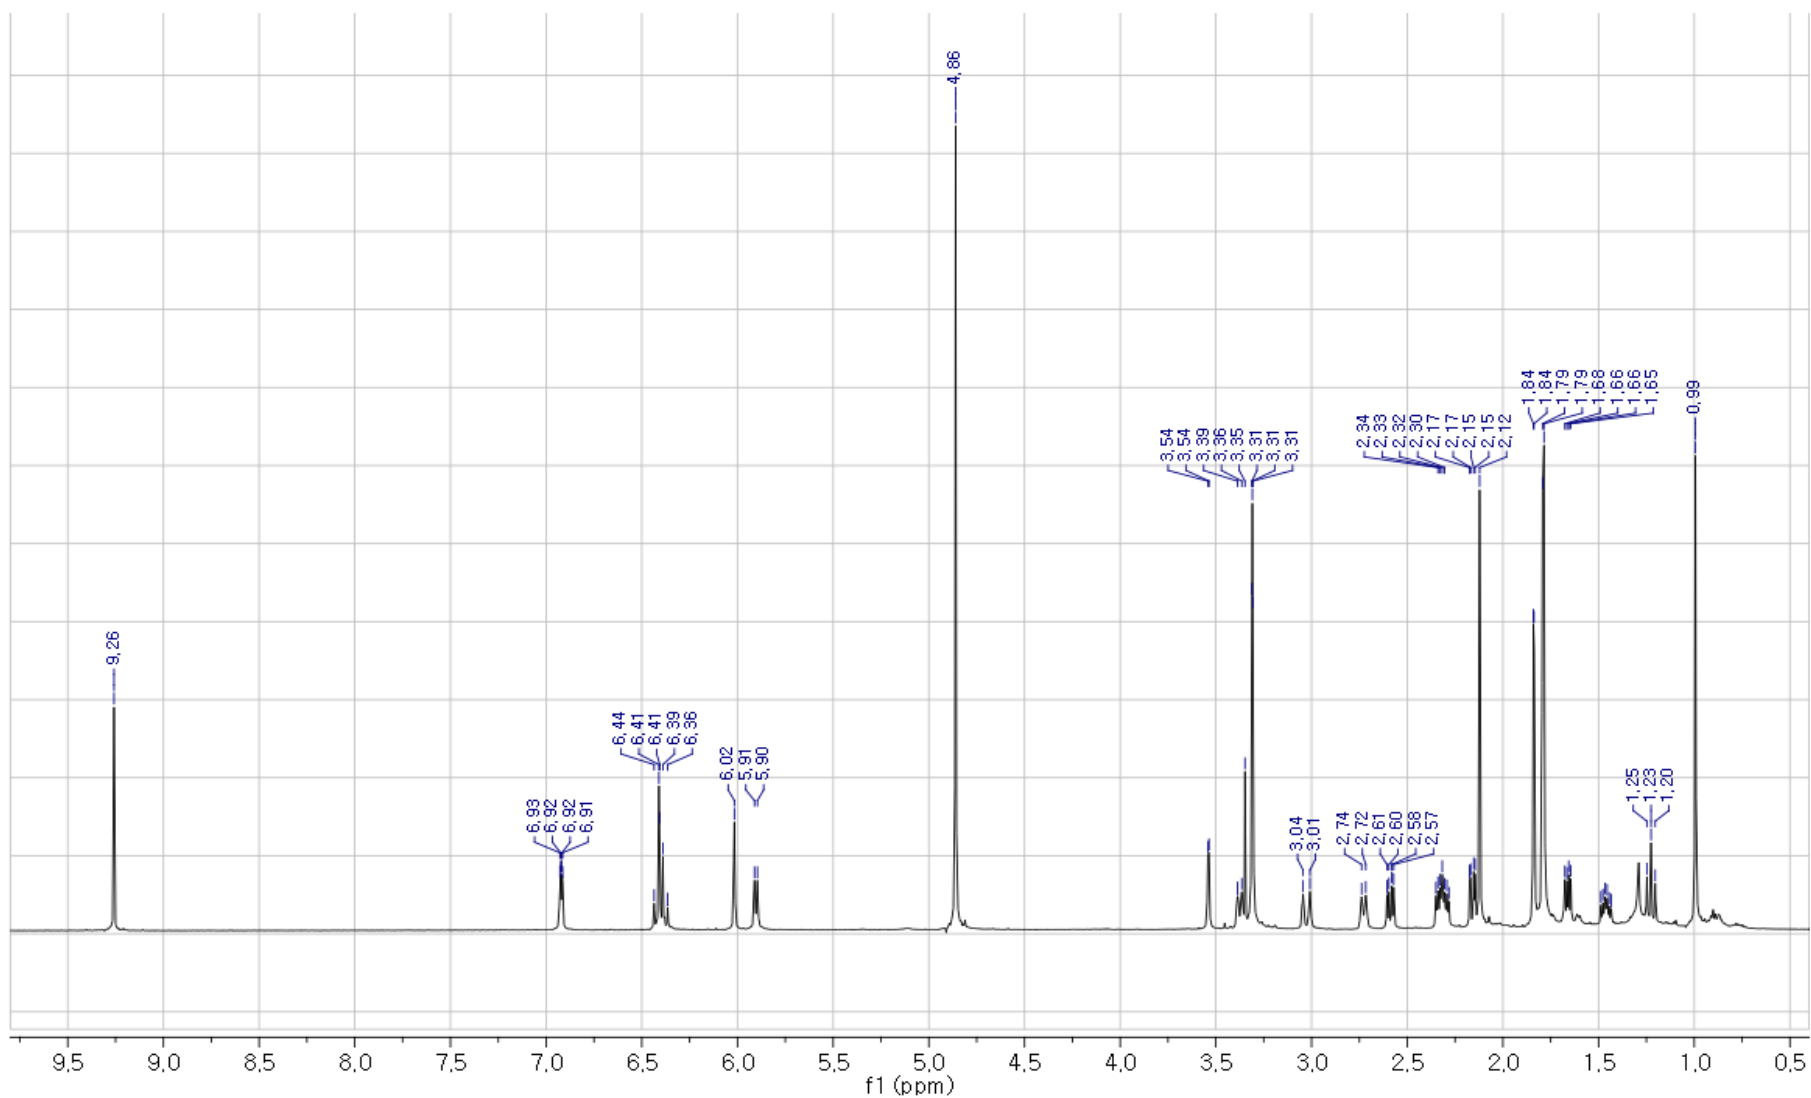

Figure S16.  $^1\text{H}$  NMR spectrum of 14,15-dehydro-6-*epi*-ophiobolin G (3).

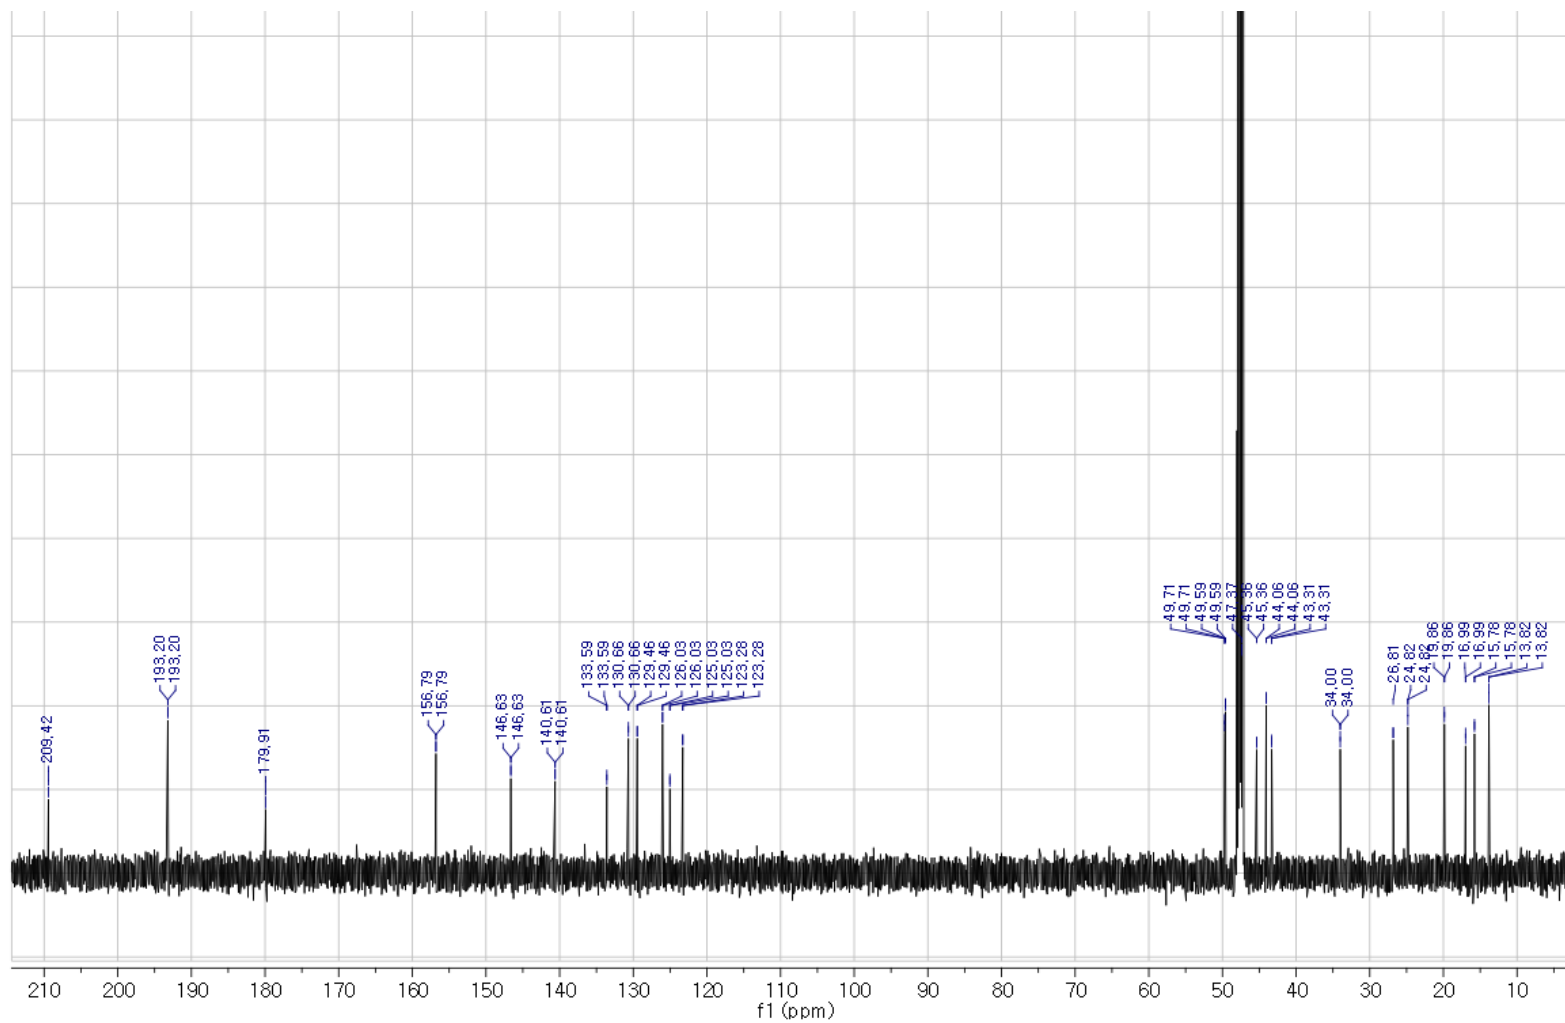

Figure S17.  $^{13}\text{C}$  NMR spectrum of 14,15-dehydro-6-*epi*-ophiobolin G (**3**).

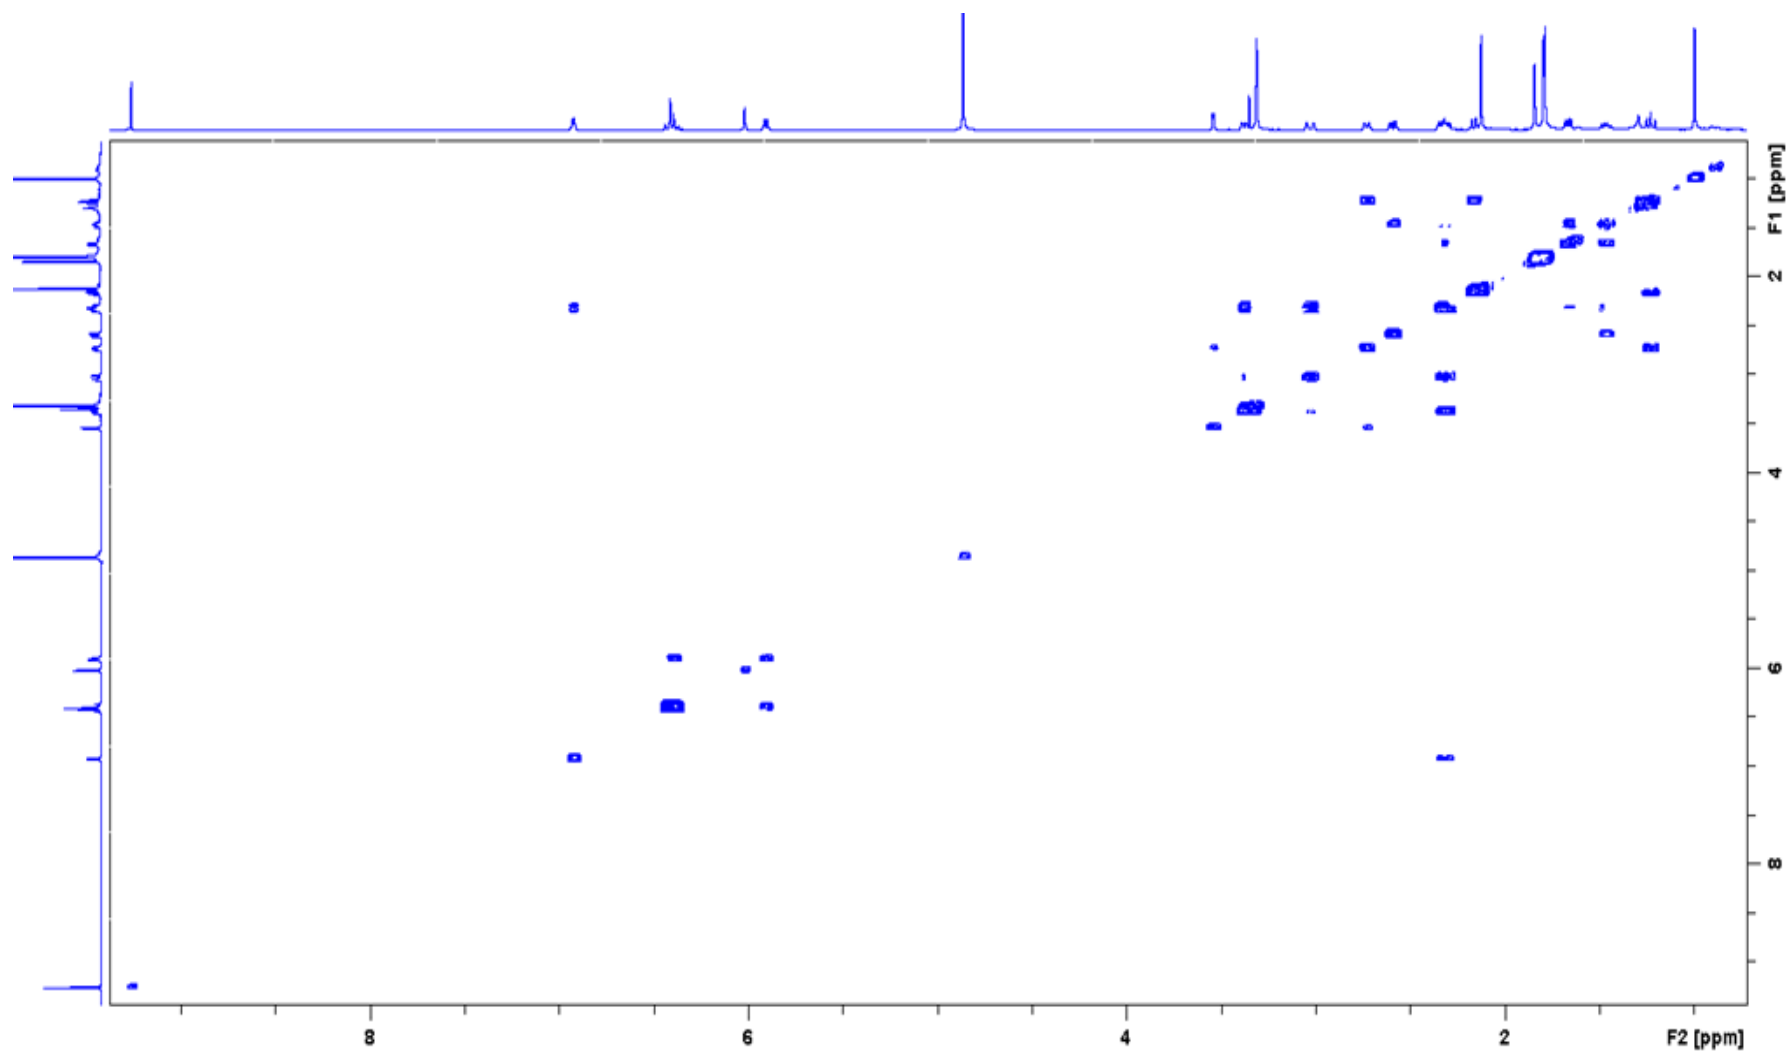

Figure S18.  $^1\text{H}$ - $^1\text{H}$  COSY spectrum of 14,15-dehydro-6-*epi*-ophiobolin G (**3**).

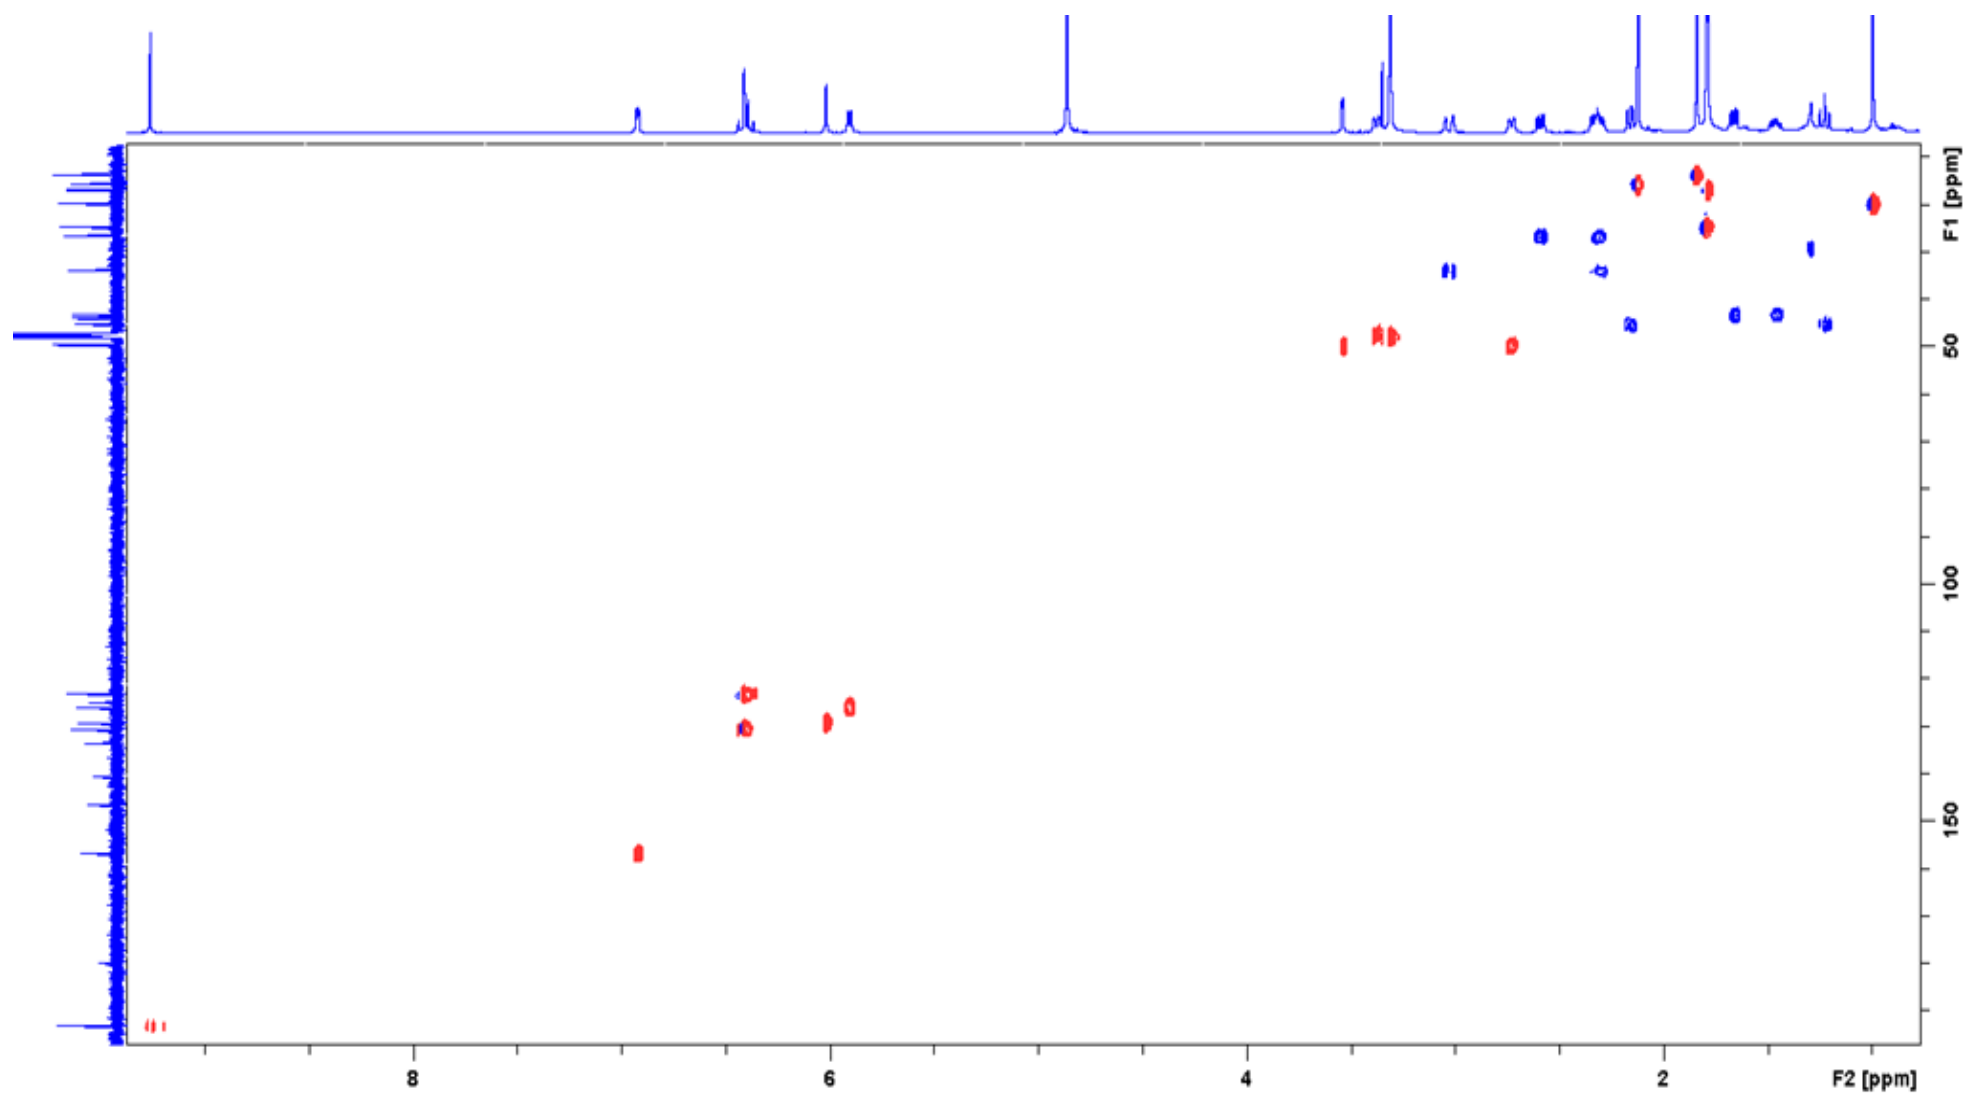

Figure S19. HSQC spectrum of 14,15-dehydro-6-*epi*-ophiobolin G (**3**).

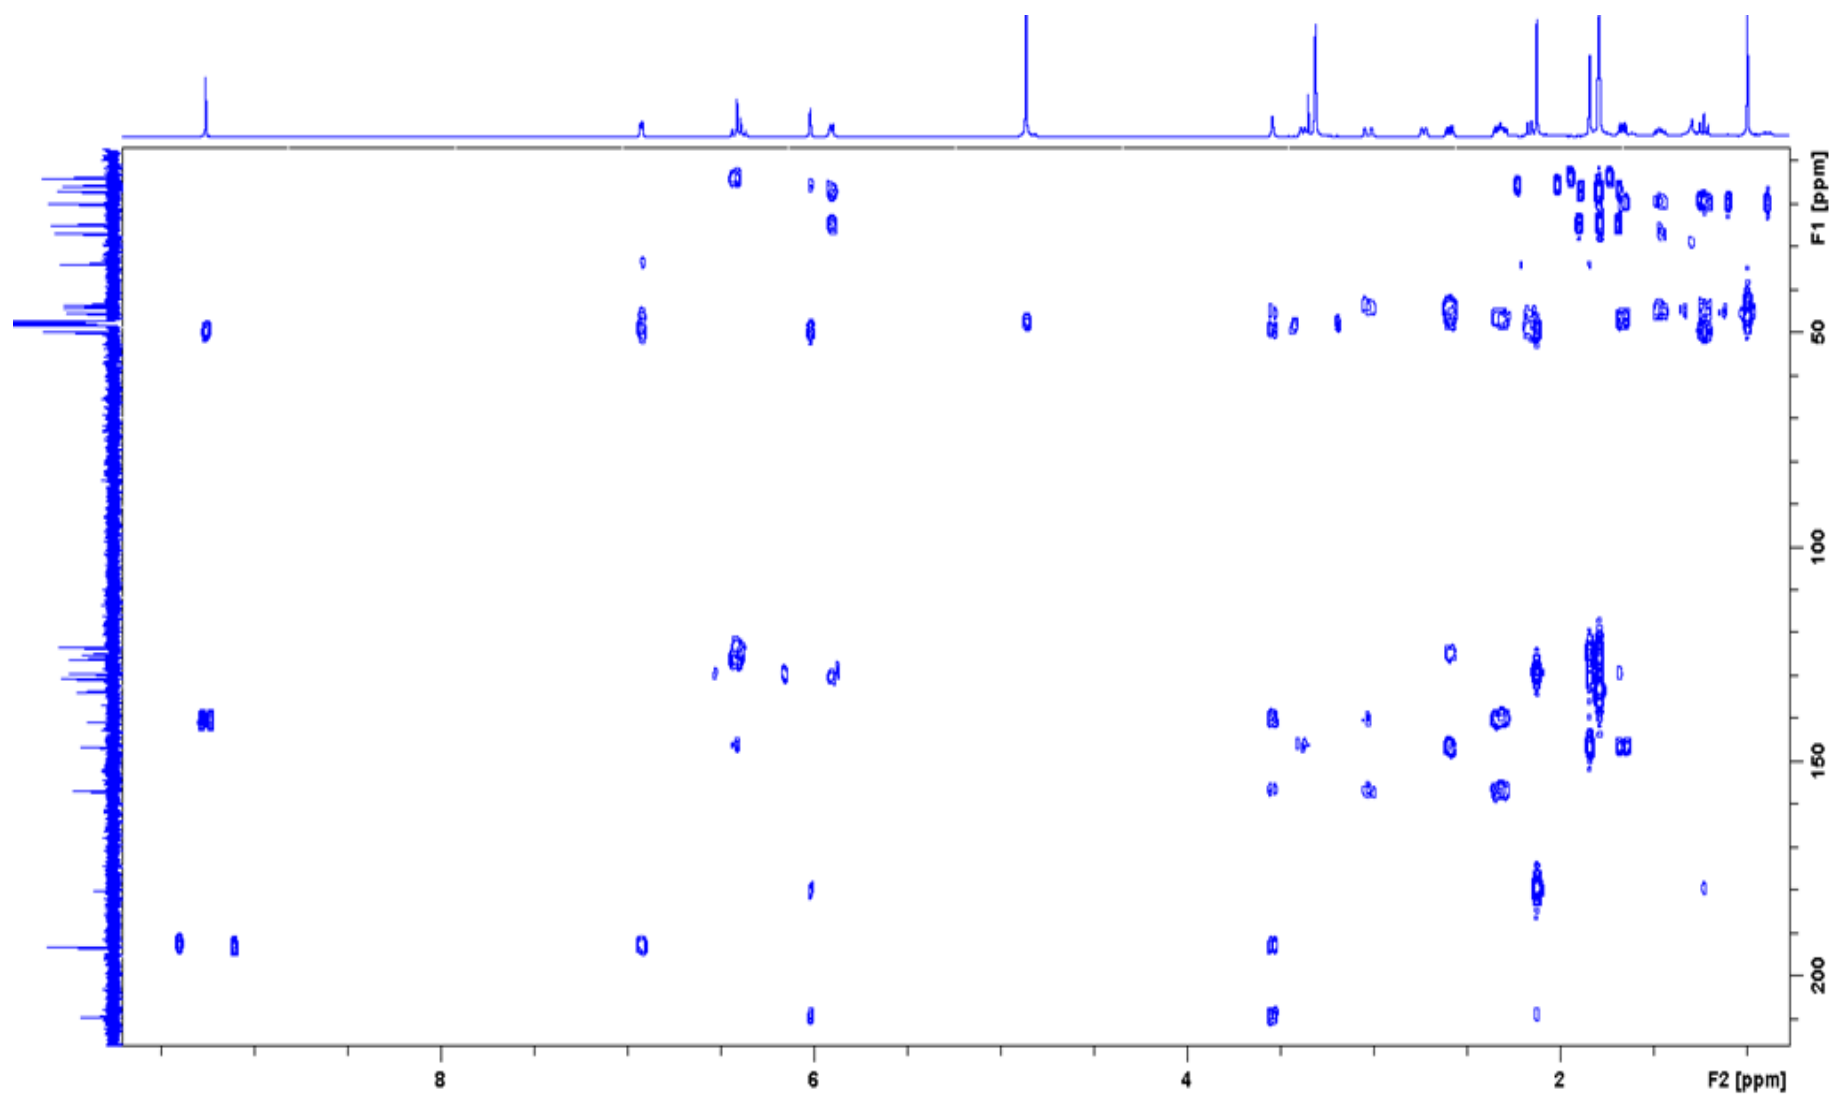

Figure S20. HMBC spectrum of 14,15-dehydro-6-*epi*-ophiobolin G (**3**).

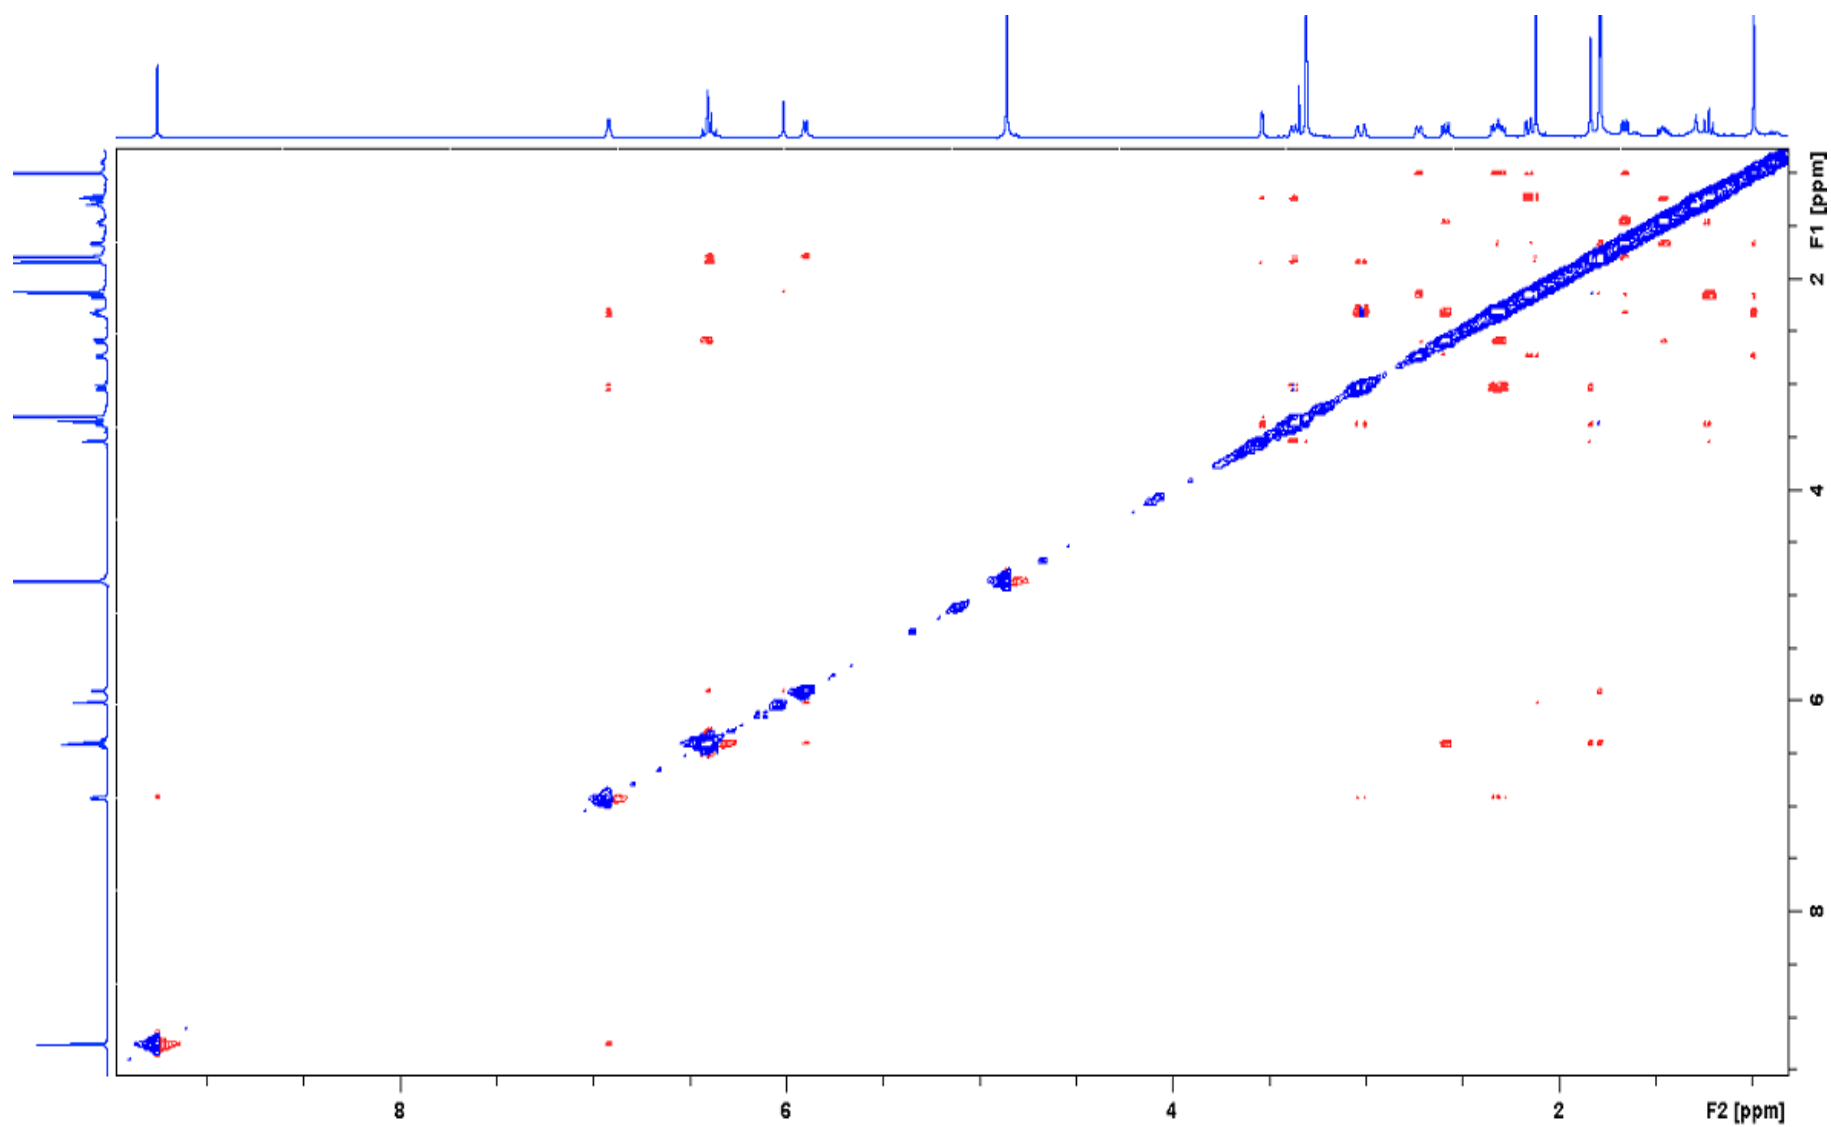

Figure S21.NOESY spectrum of 14,15-dehydro-6-*epi*-ophiobolin G (3).



### Elemental Composition Report

Single Mass Analysis  
Tolerance = 5.0 PPM / DBE: min = -1.5, max = 50.0  
Element prediction: Off  
Number of isotope peaks used for i-FIT = 3

Monoisotopic Mass, Even Electron Ions  
40 formula(e) evaluated with 1 results within limits (all results (up to 1000) for each mass)

Elements Used:

C: 1-30 H: 1-50 O: 1-5 Na: 0-1

Minimum: 500.0 5.0 -1.5

Maximum: 500.0 5.0 50.0

| Mass     | Calc. Mass | mDa  | PPM  | DBE | i-FIT  | Norm | Conf(%) | Formula       |
|----------|------------|------|------|-----|--------|------|---------|---------------|
| 387.2299 | 387.2300   | -0.1 | -0.3 | 9.5 | 1248.9 | n/a  | n/a     | C25 H32 O2 Na |

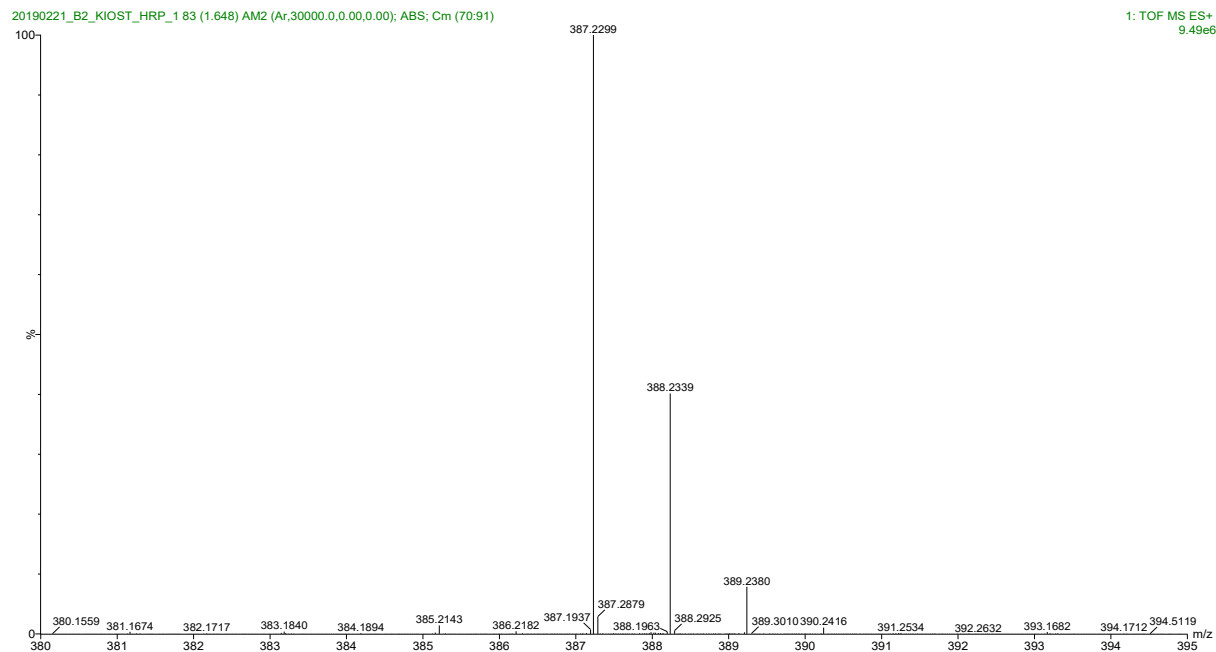

Figure S22. HRESIMS data of 14,15-dehydro-ophiobolin G (4).

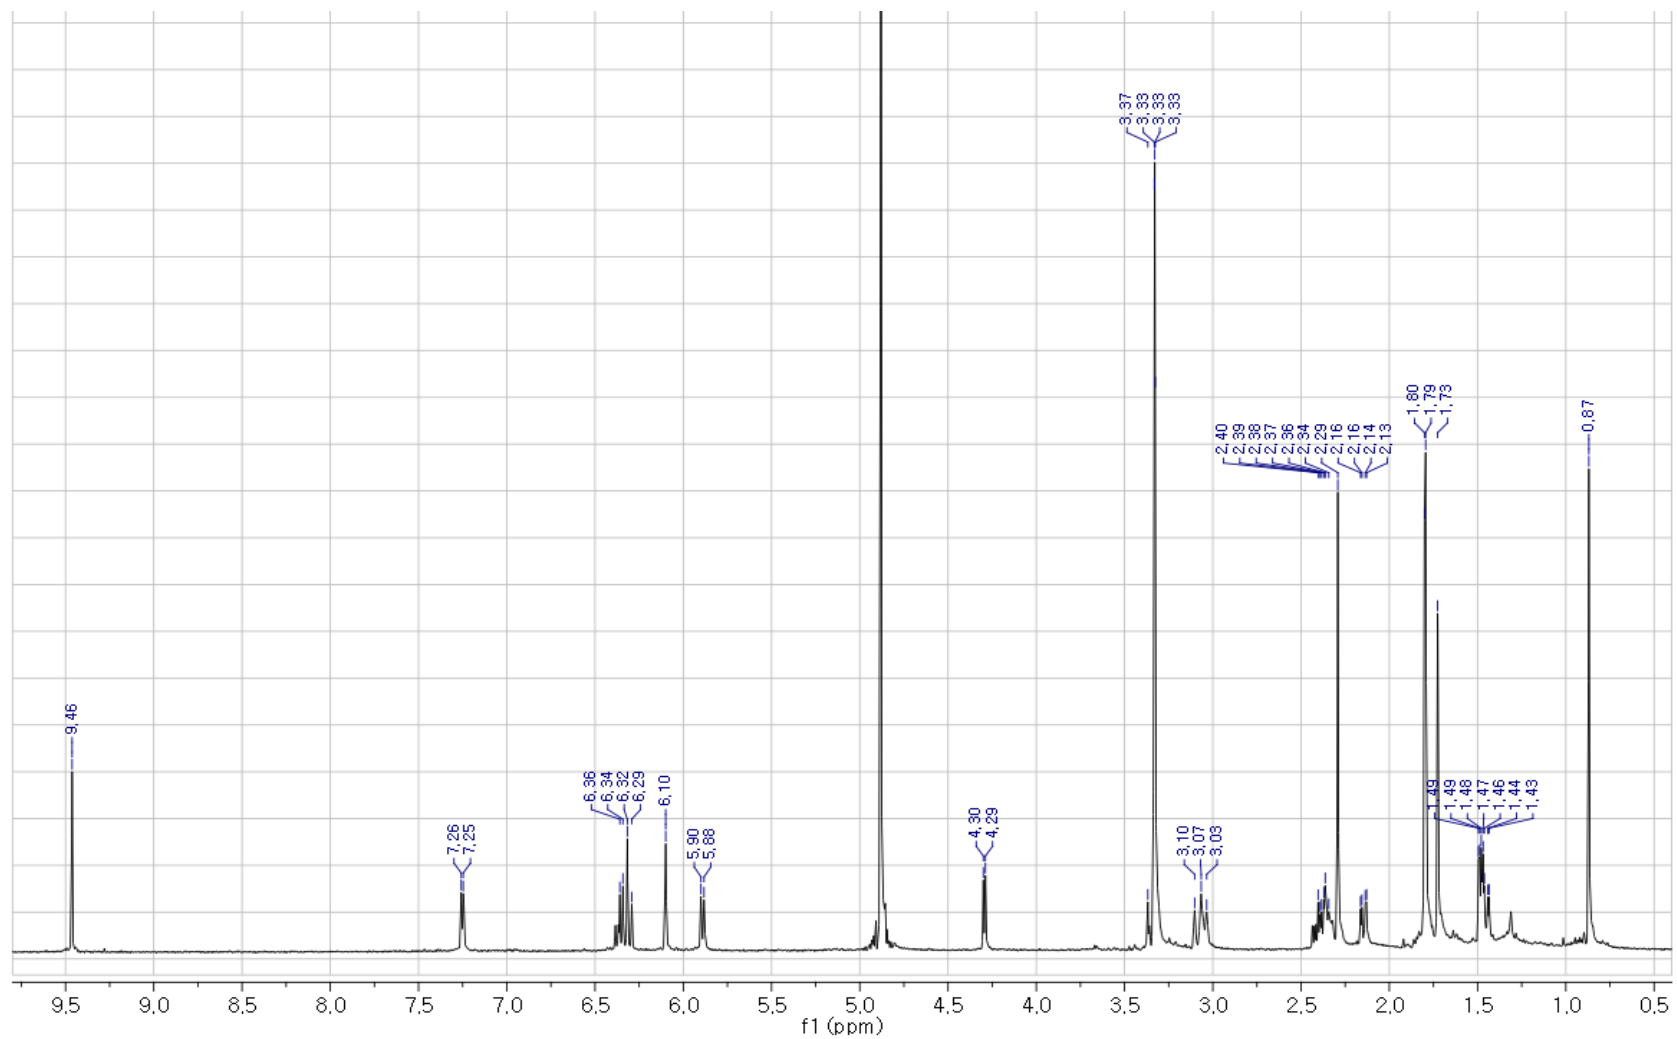

Figure S23. <sup>1</sup>H NMR spectrum of 14,15-dehydro-ophiobolin G (4).

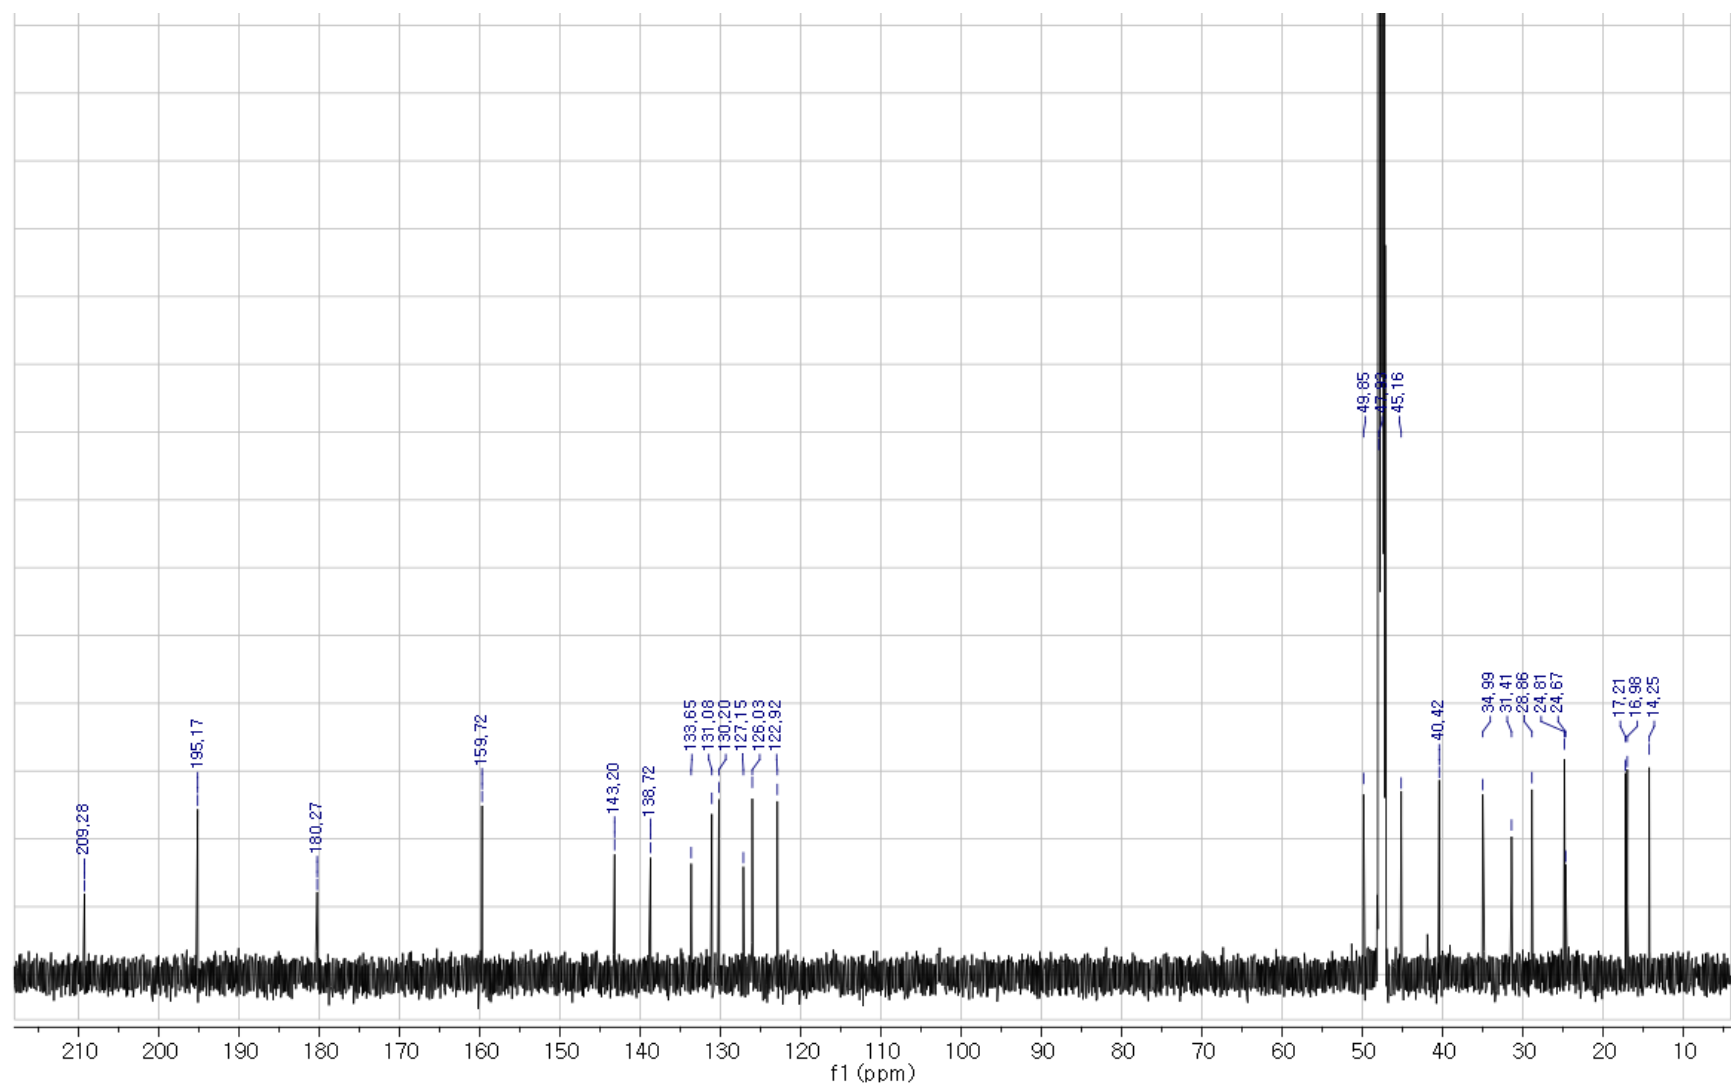

Figure S24. <sup>13</sup>C NMR spectrum of 14,15-dehydro-ophiobolin G (4).

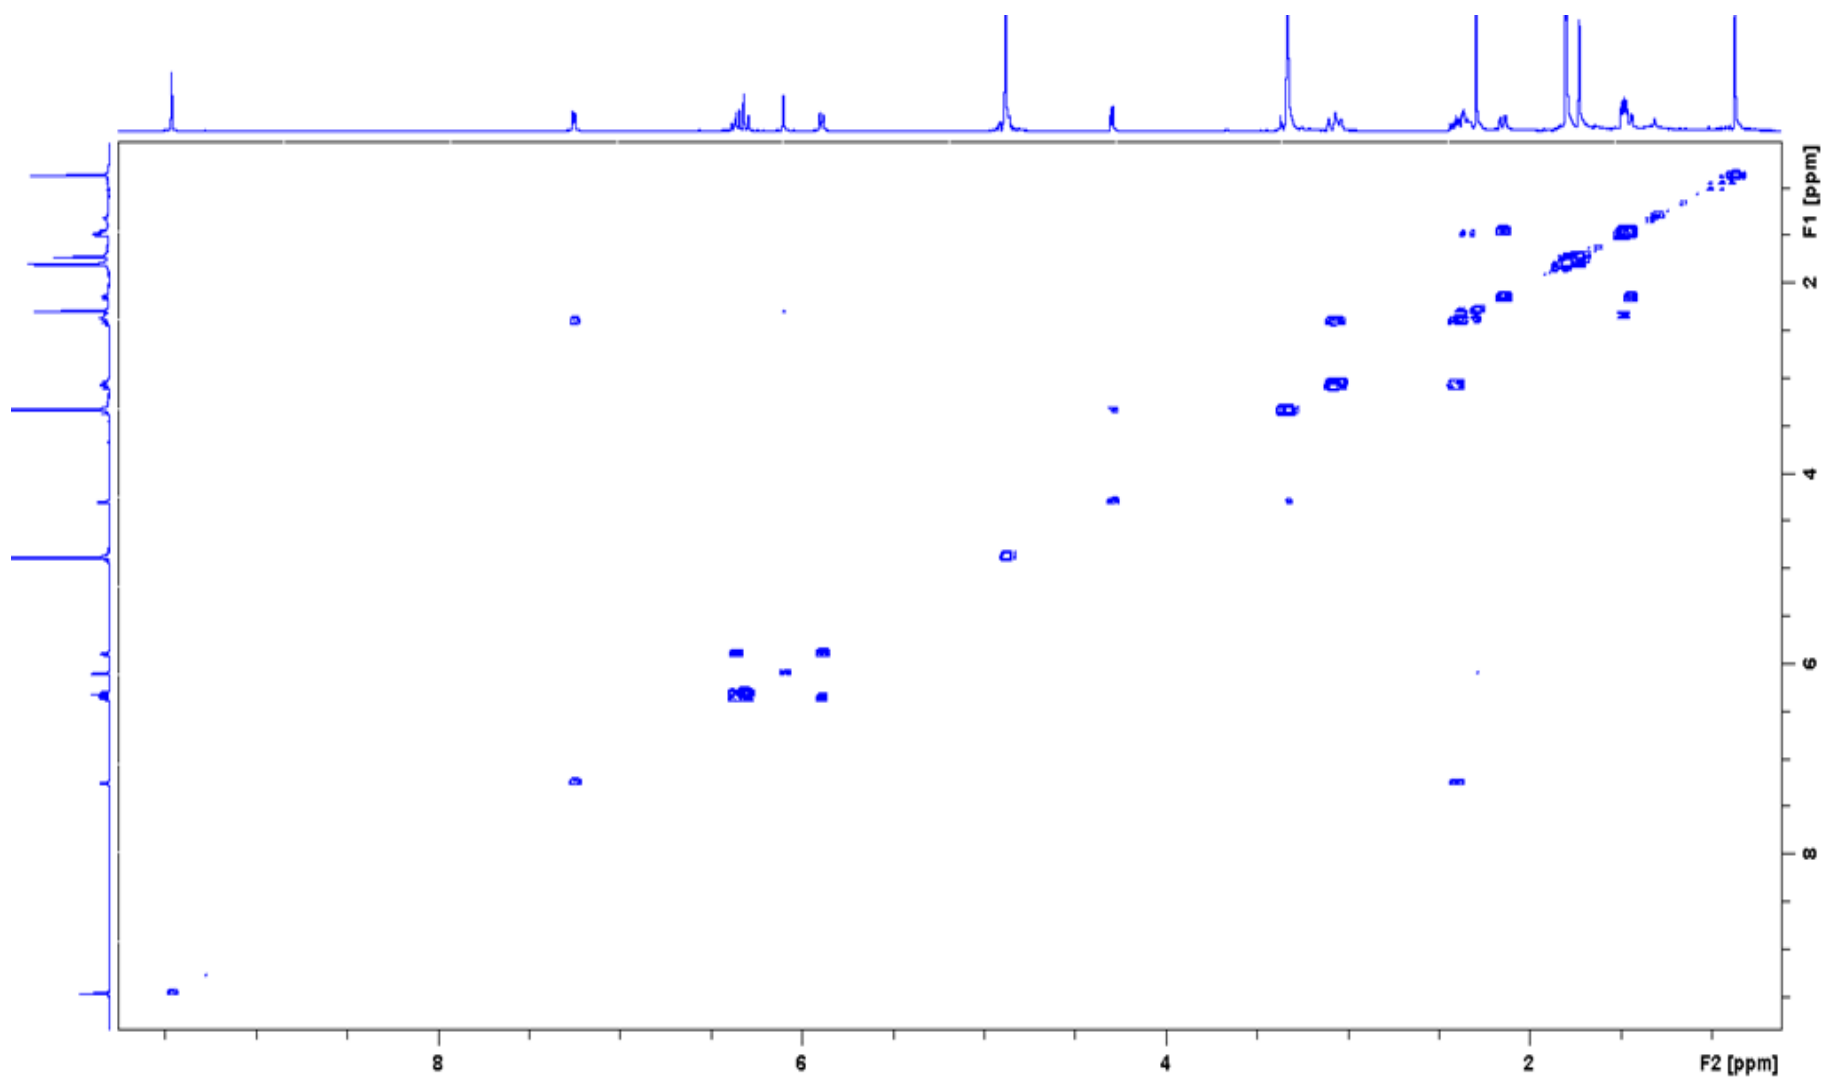

Figure S25.  $^1\text{H}$ - $^1\text{H}$  COSY spectrum of 14,15-dehydro-ophiobolin G (4).

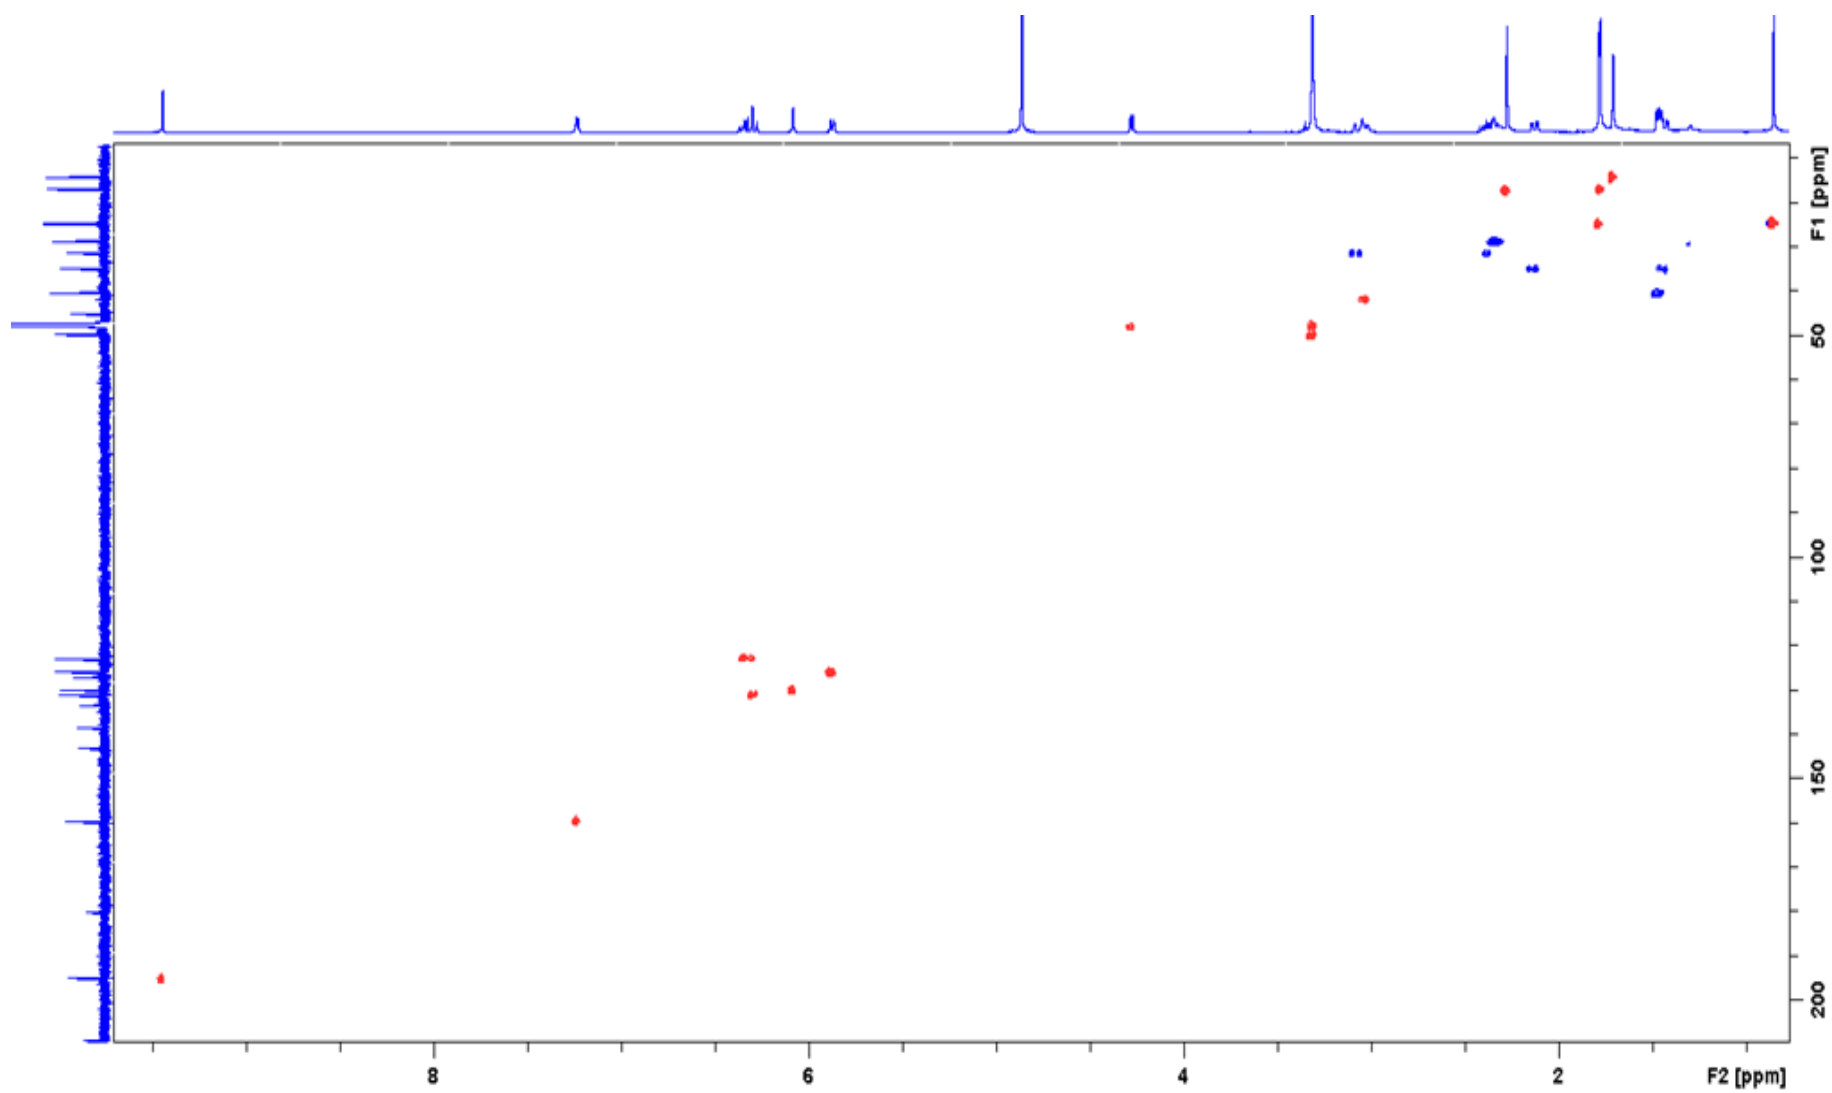

Figure S26. HSQC spectrum of 14,15-dehydro-ophiobolin G (4).

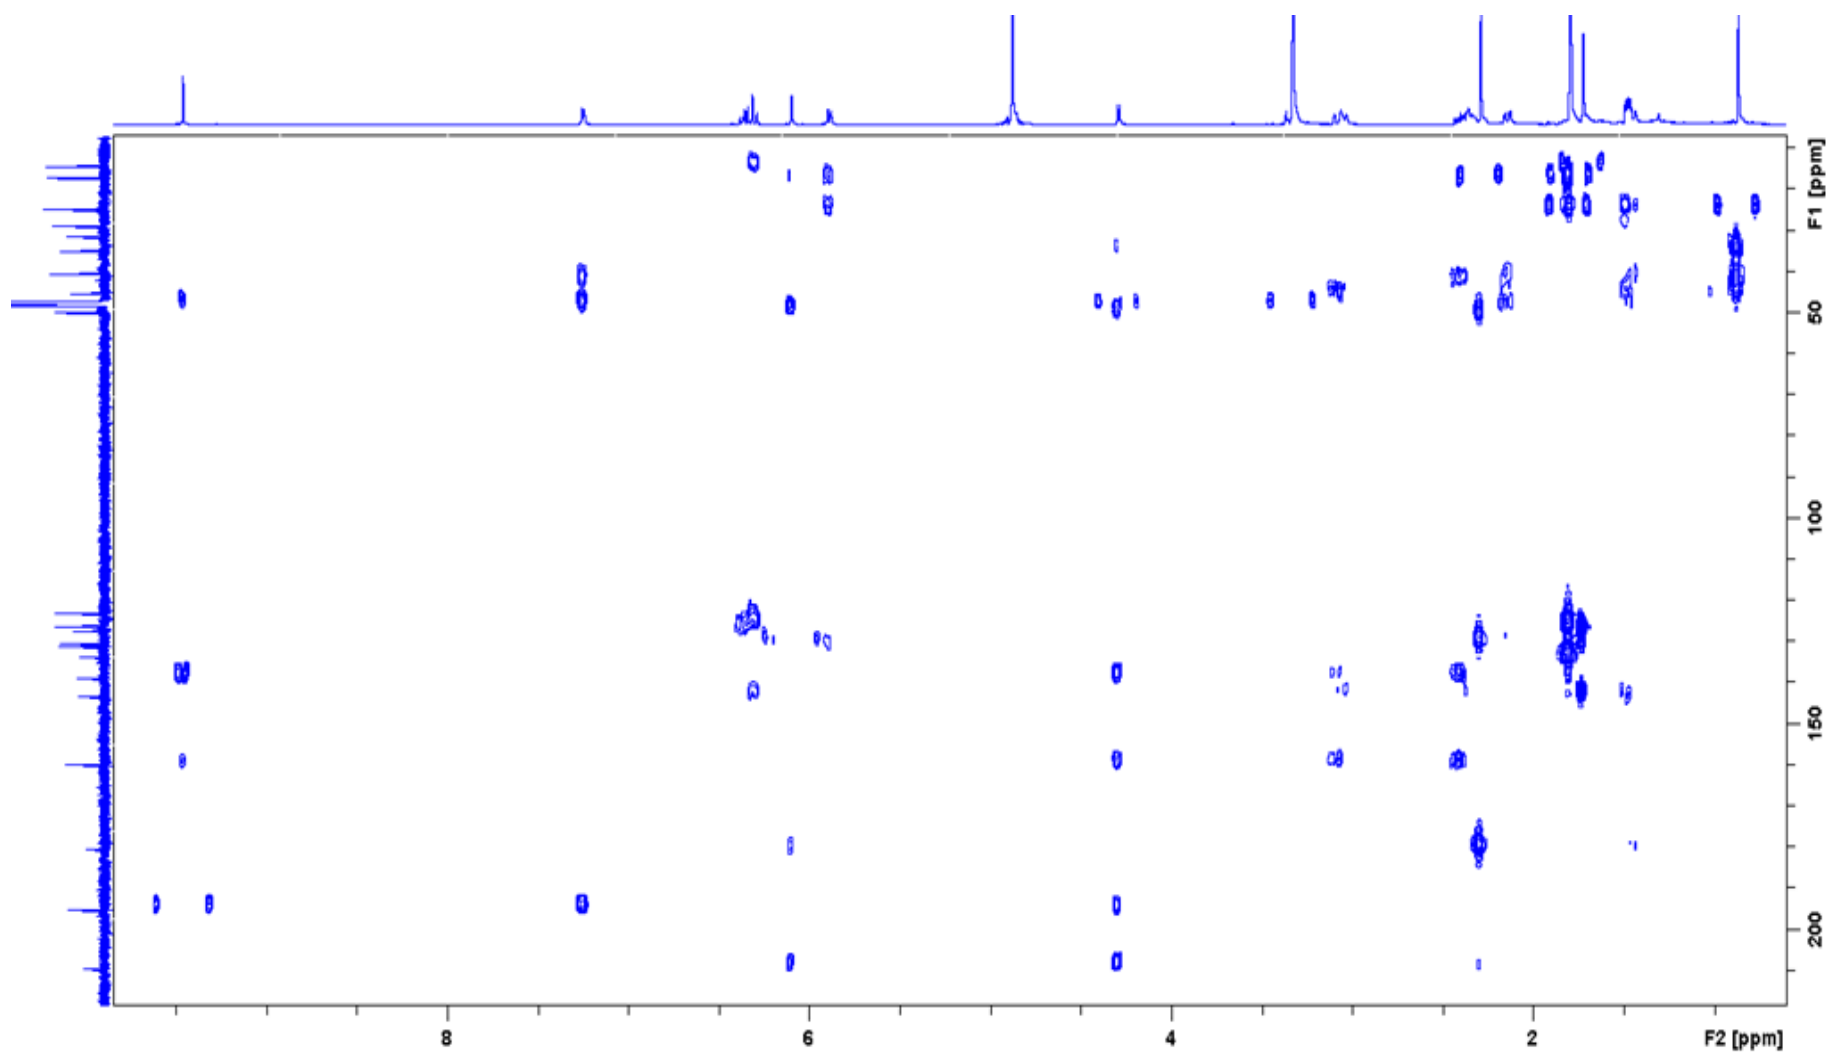

Figure S27. HMBC spectrum of 14,15-dehydro-ophiobolin G (4).

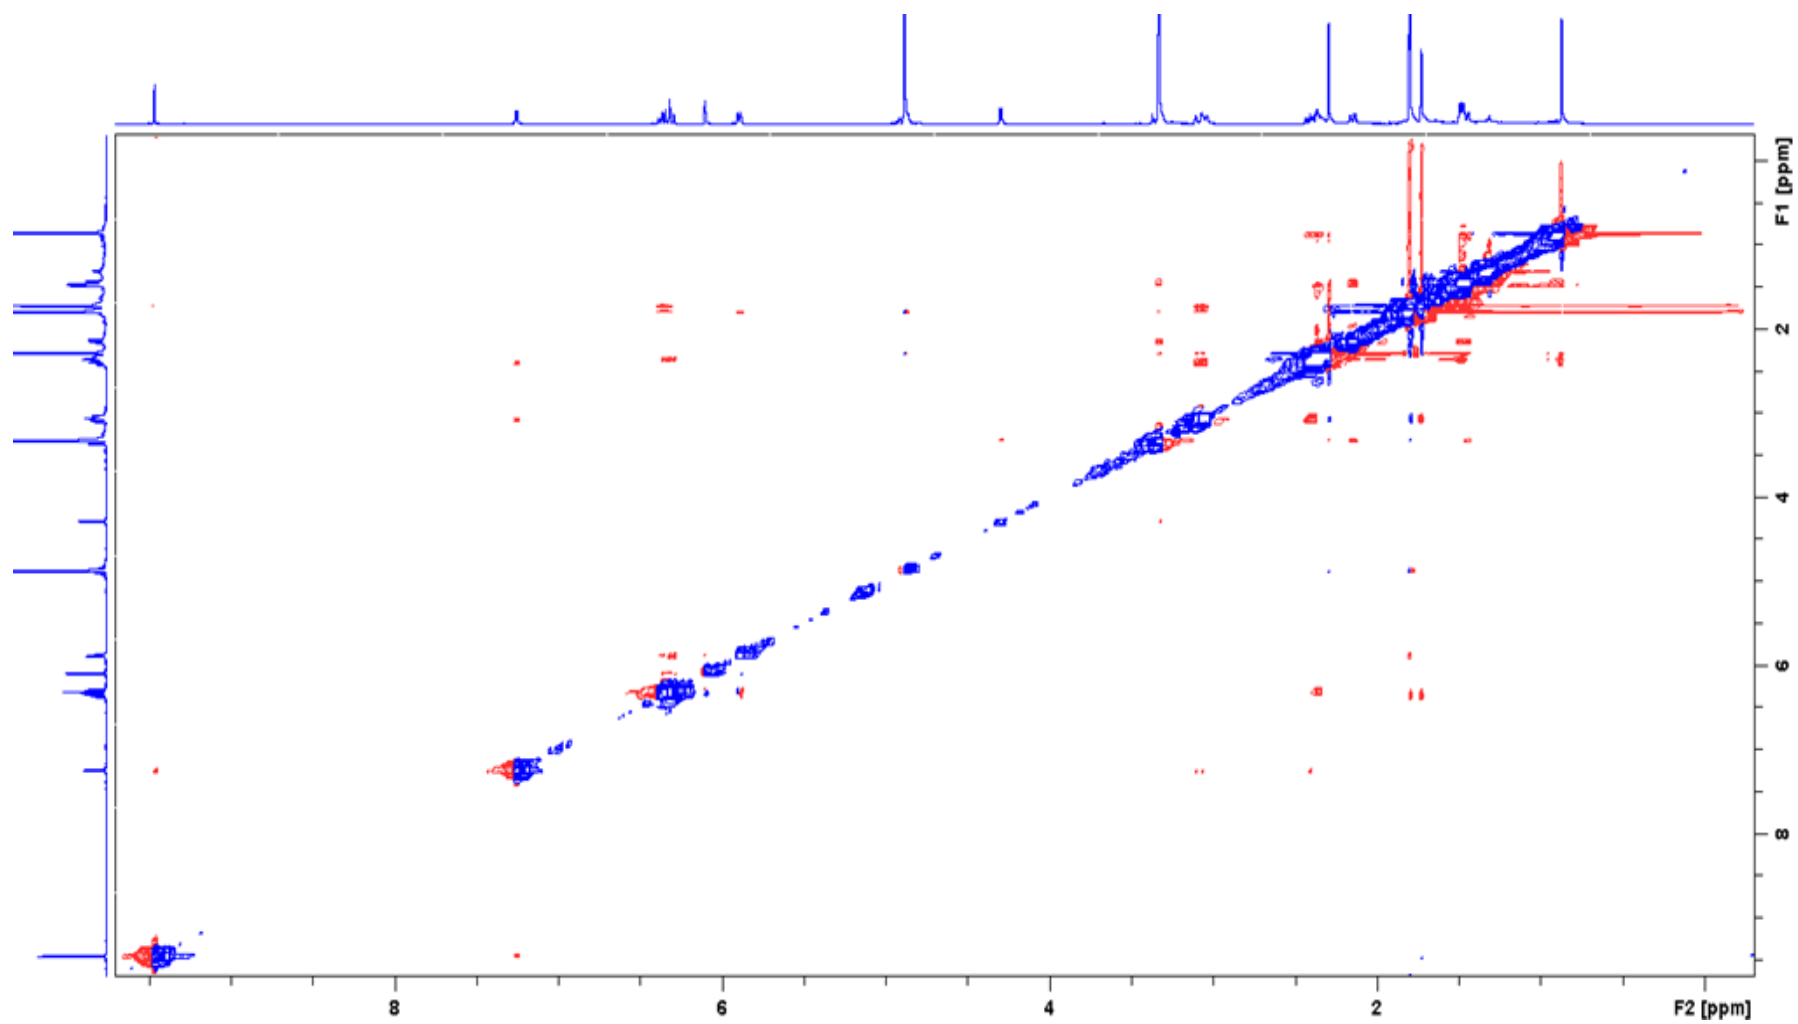

Figure S28. NOESY spectrum of 14,15-dehydro-ophiobolin G (4).

### Elemental Composition Report

Single Mass Analysis  
Tolerance = 5.0 PPM / DBE: min = -1.5, max = 50.0  
Element prediction: Off  
Number of isotope peaks used for i-FIT = 3

Monoisotopic Mass, Even Electron Ions  
82 formula(e) evaluated with 1 results within limits (all results (up to 1000) for each mass)

Elements Used:

C: 1-55 H: 1-80 O: 1-10 Na: 0-1

Minimum: -1.5

Maximum: 500.0 5.0 50.0

| Mass     | Calc. Mass | mDa  | PPM  | DBE | i-FIT  | Norm | Conf(%) | Formula       |
|----------|------------|------|------|-----|--------|------|---------|---------------|
| 387.2299 | 387.2300   | -0.1 | -0.3 | 9.5 | 1135.1 | n/a  | n/a     | C25 H32 O2 Na |

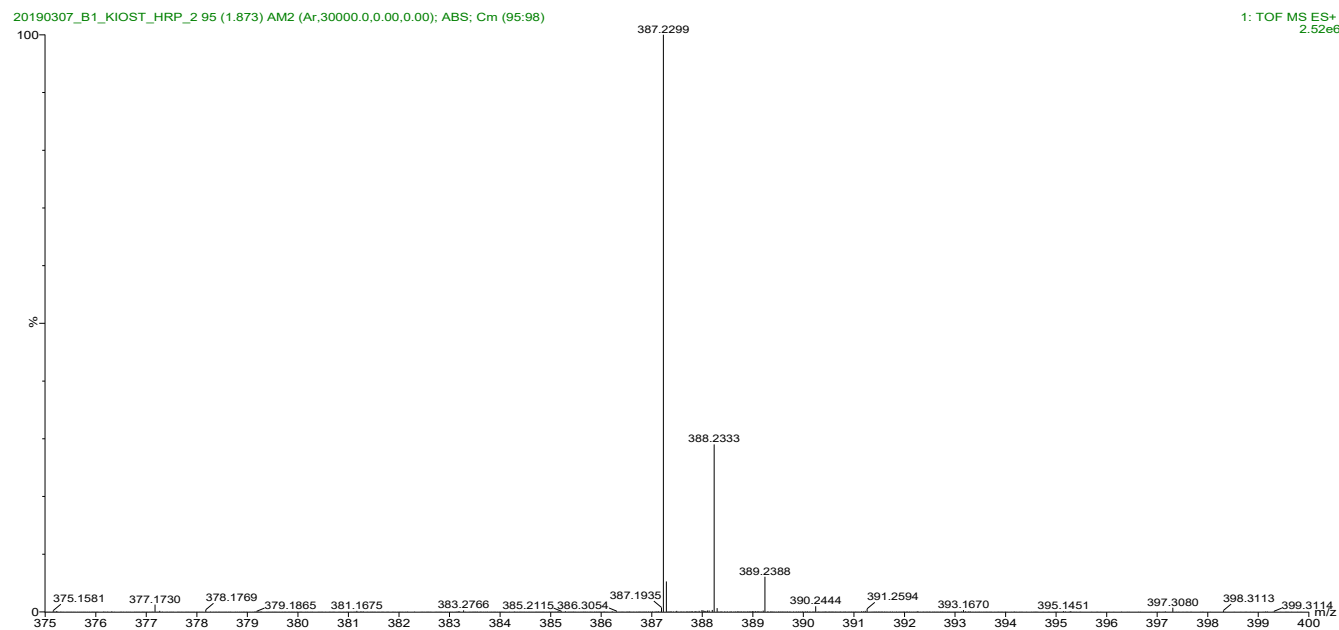

Figure S29. HRESIMS data of 14,15-dehydro-(Z)-14-ophiobolin G (5).



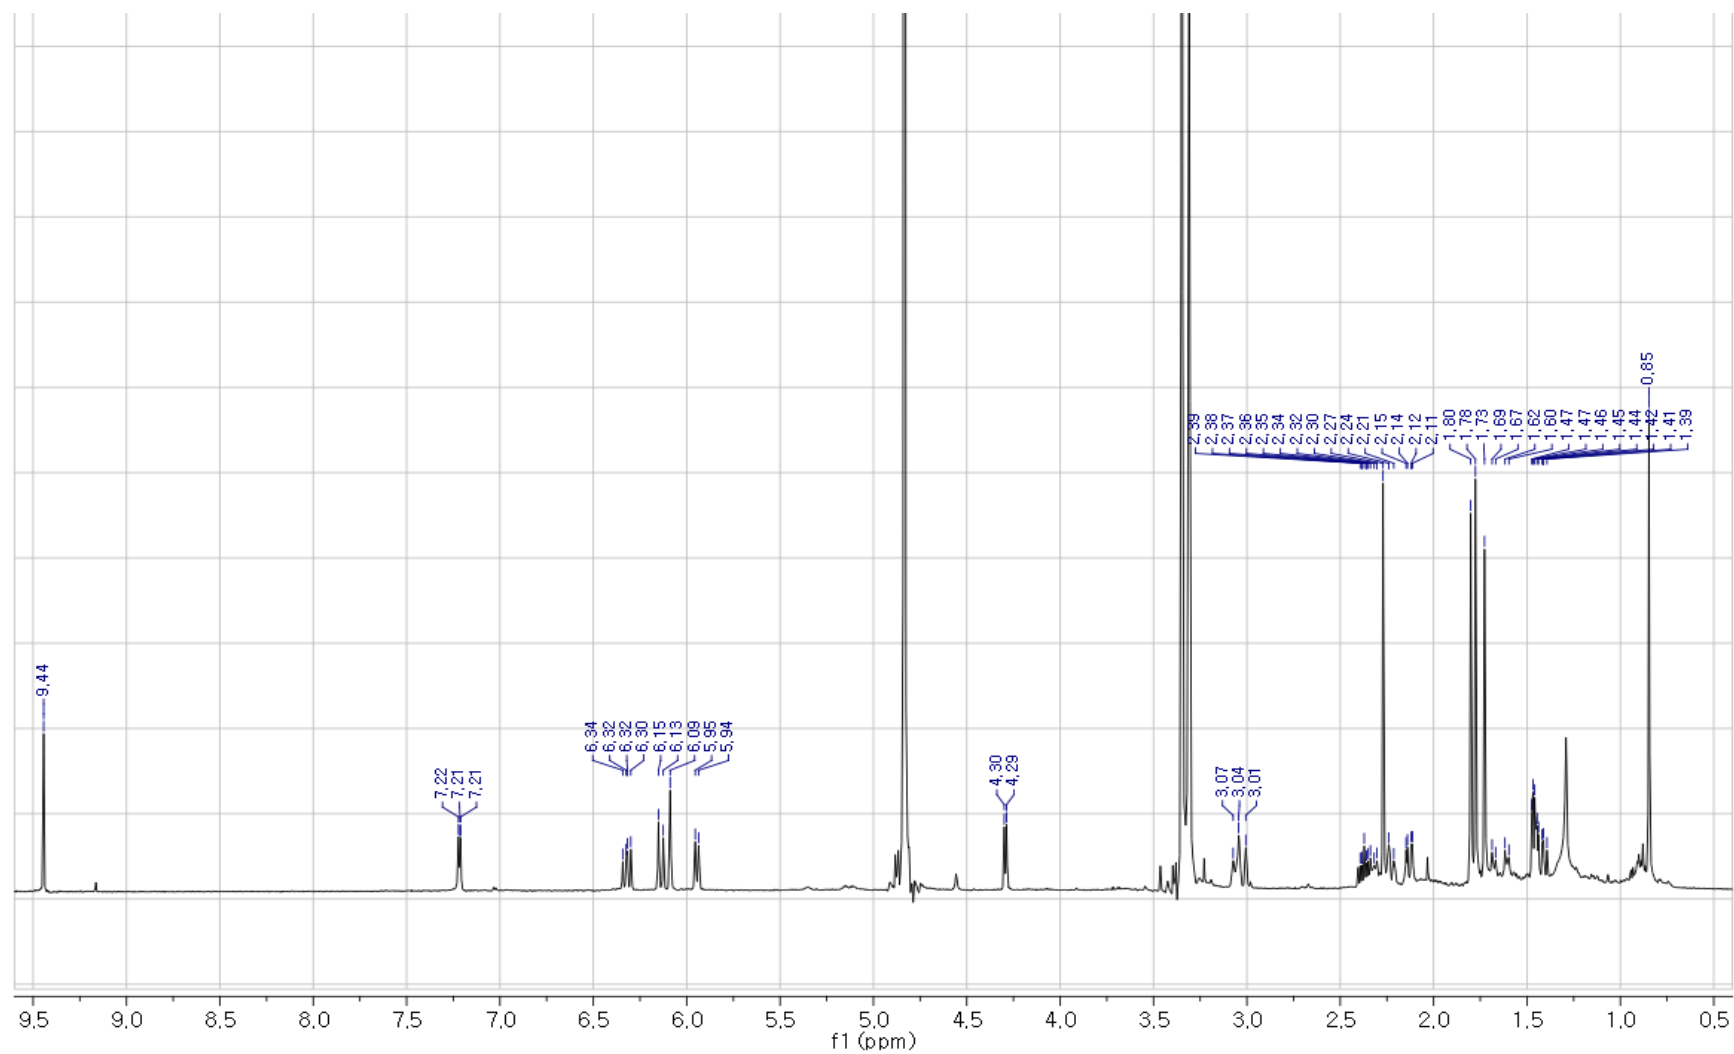

Figure S30. <sup>1</sup>H NMR spectrum of 14,15-dehydro-(Z)-14-ophiobolin G (5).

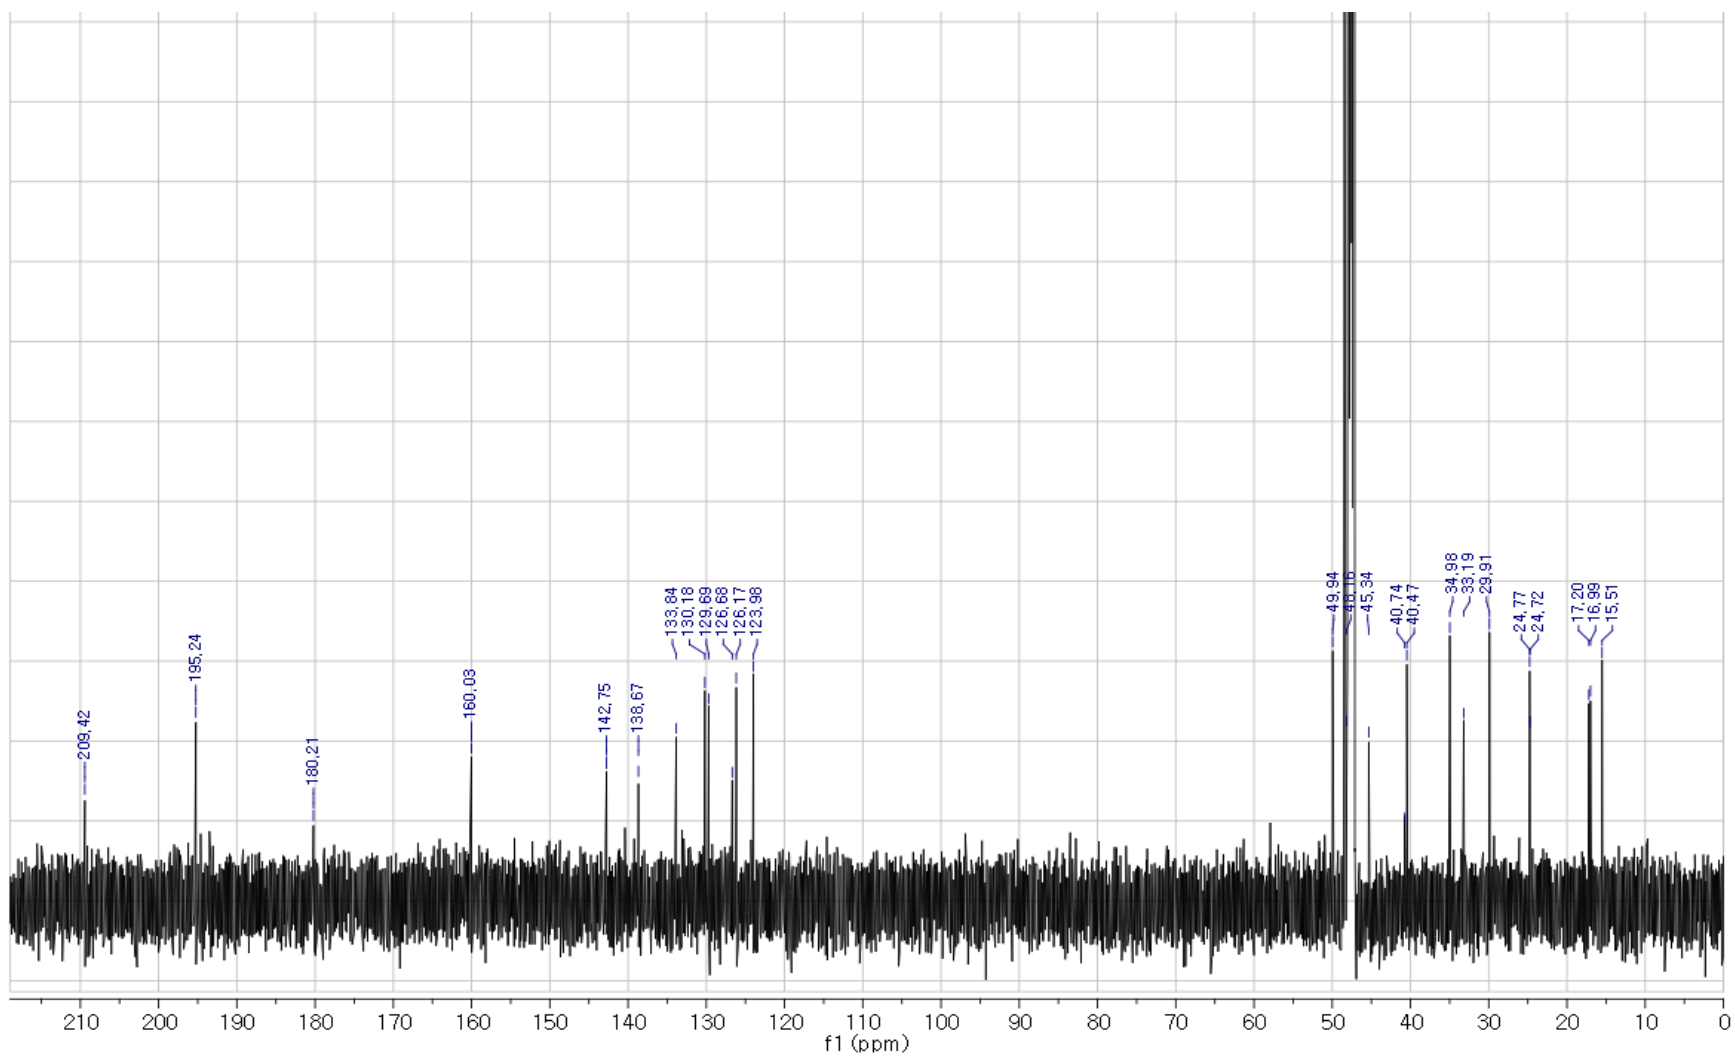

Figure S31. <sup>13</sup>C NMR spectrum of 14,15-dehydro-(Z)-14-ophiobolin G (5).



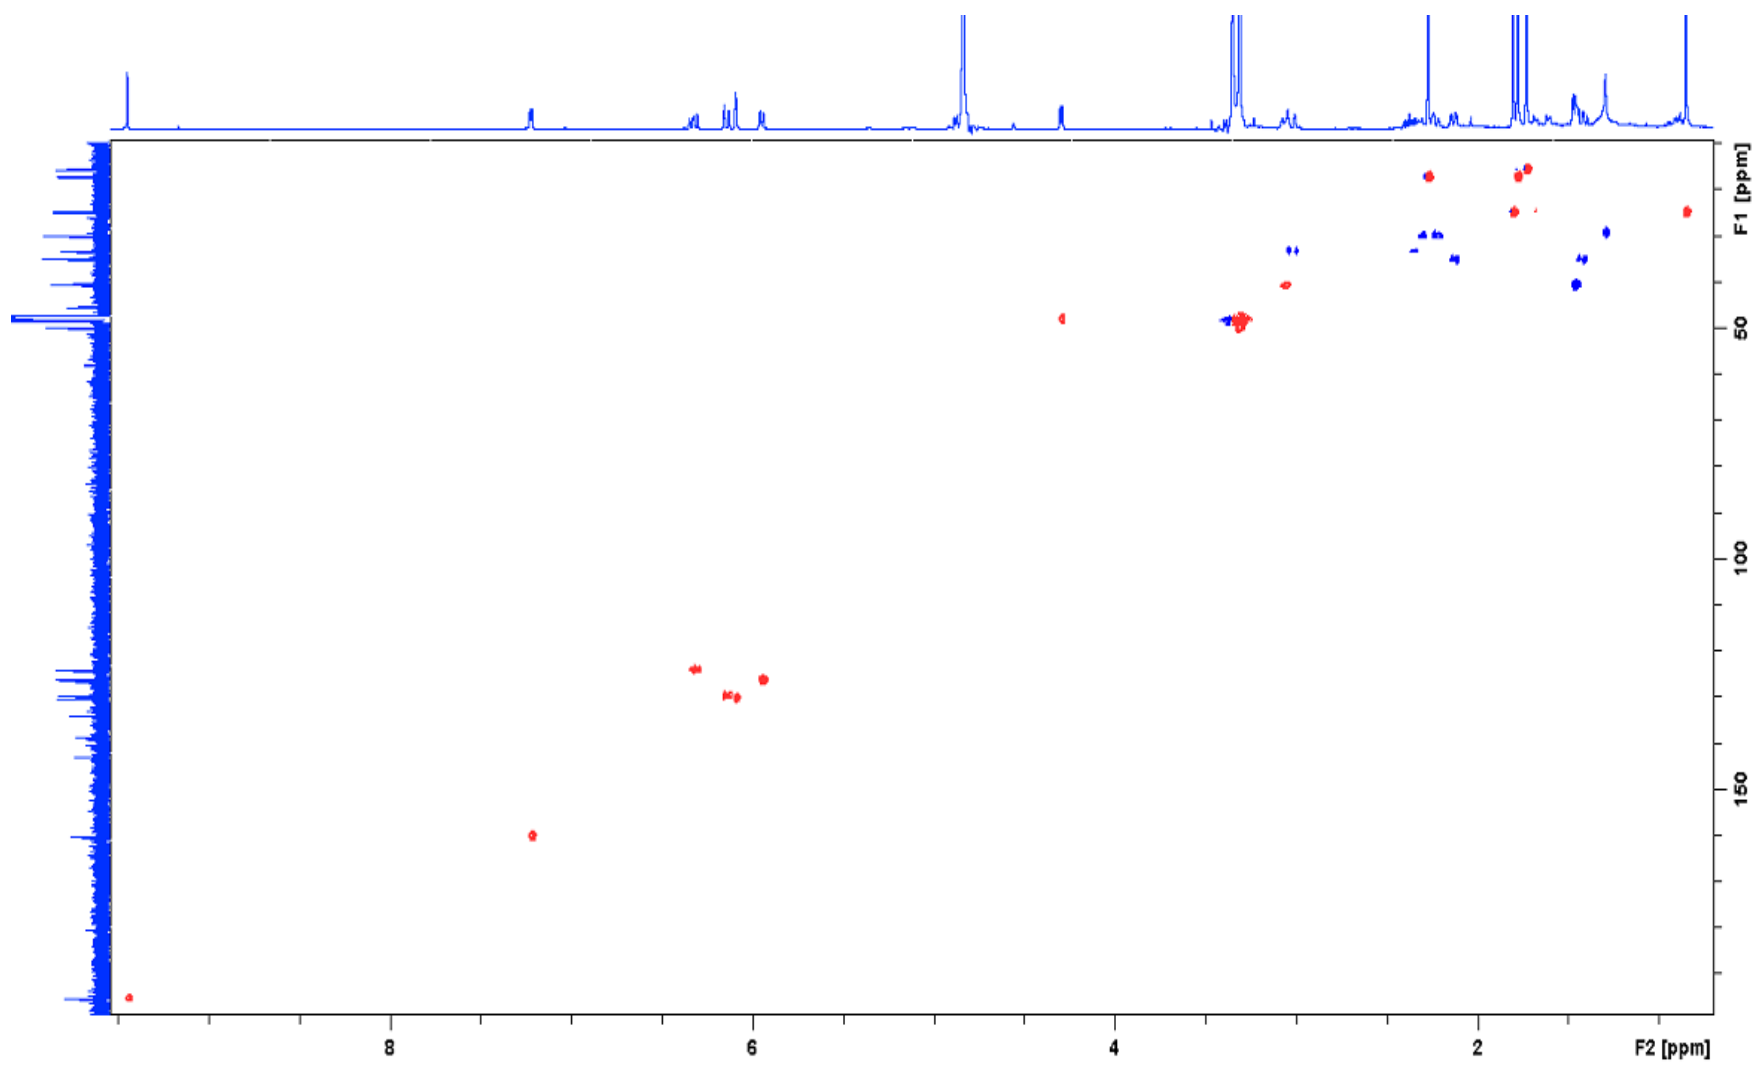

Figure S33. HSQC spectrum of 14,15-dehydro-(*Z*)-14-ophiobolin G (**5**).

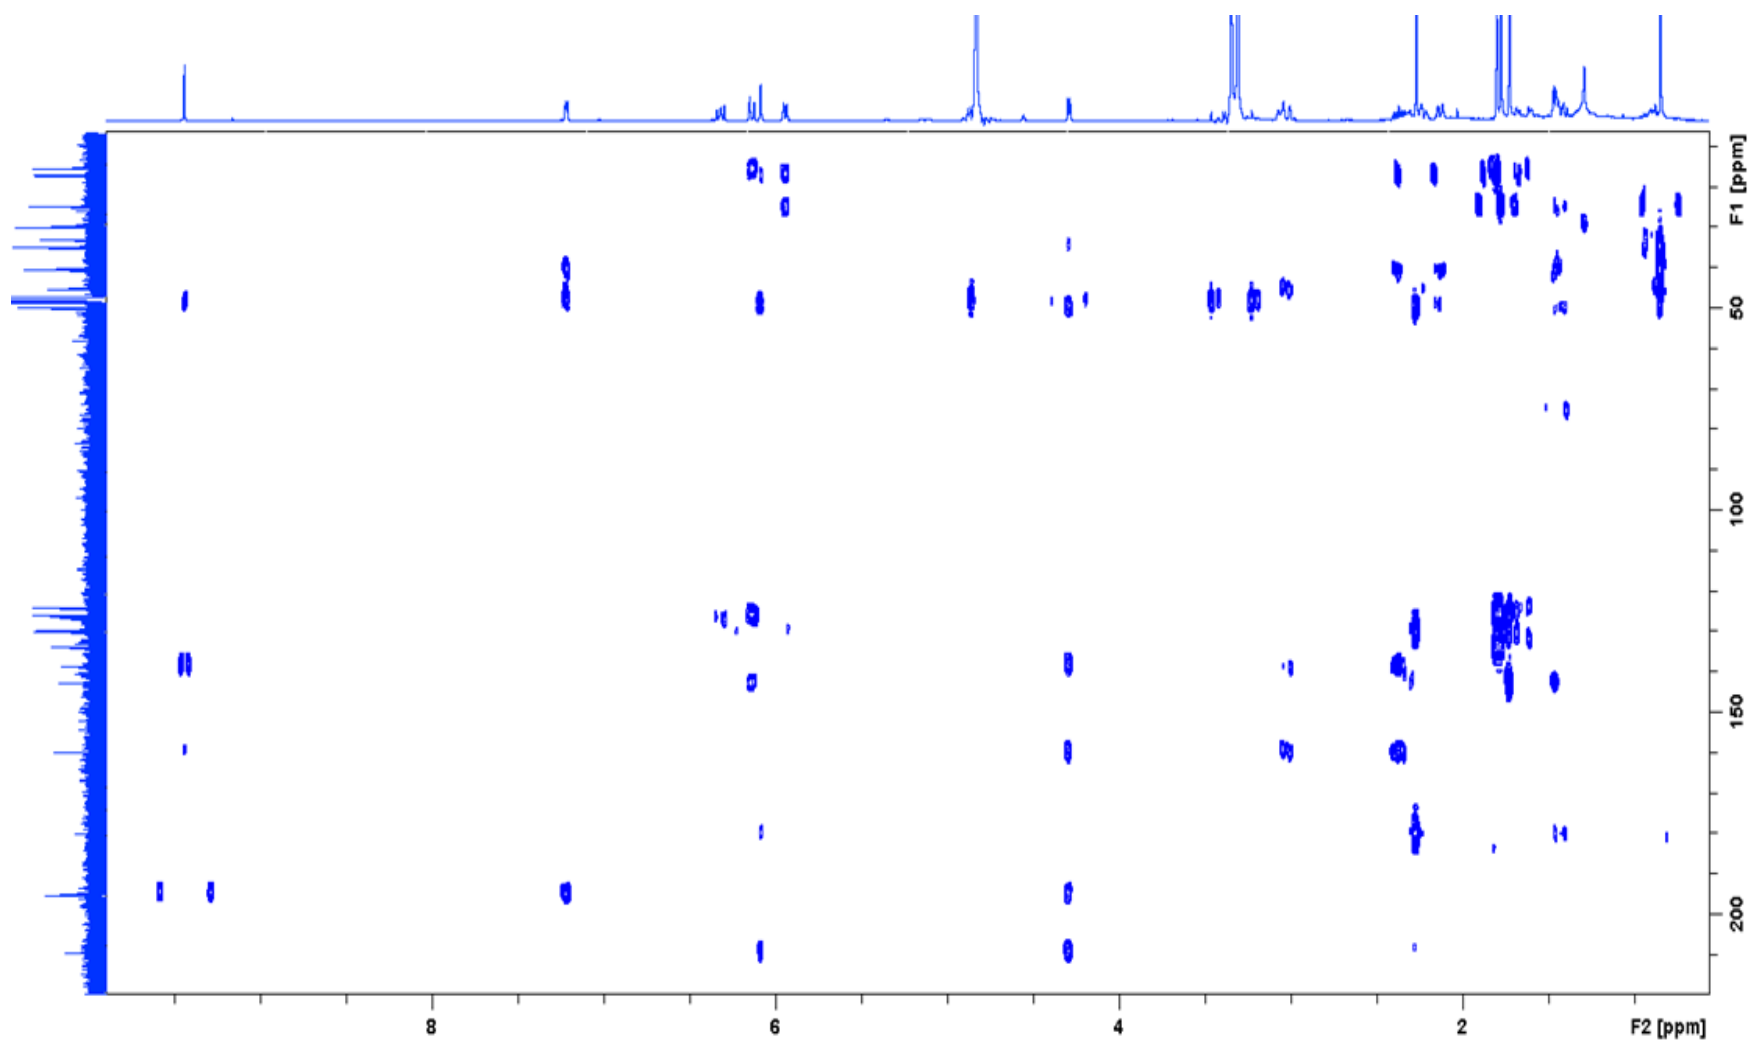

Figure S34. HMBC spectrum of 14,15-dehydro-(Z)-14-ophiobolin G (**5**).

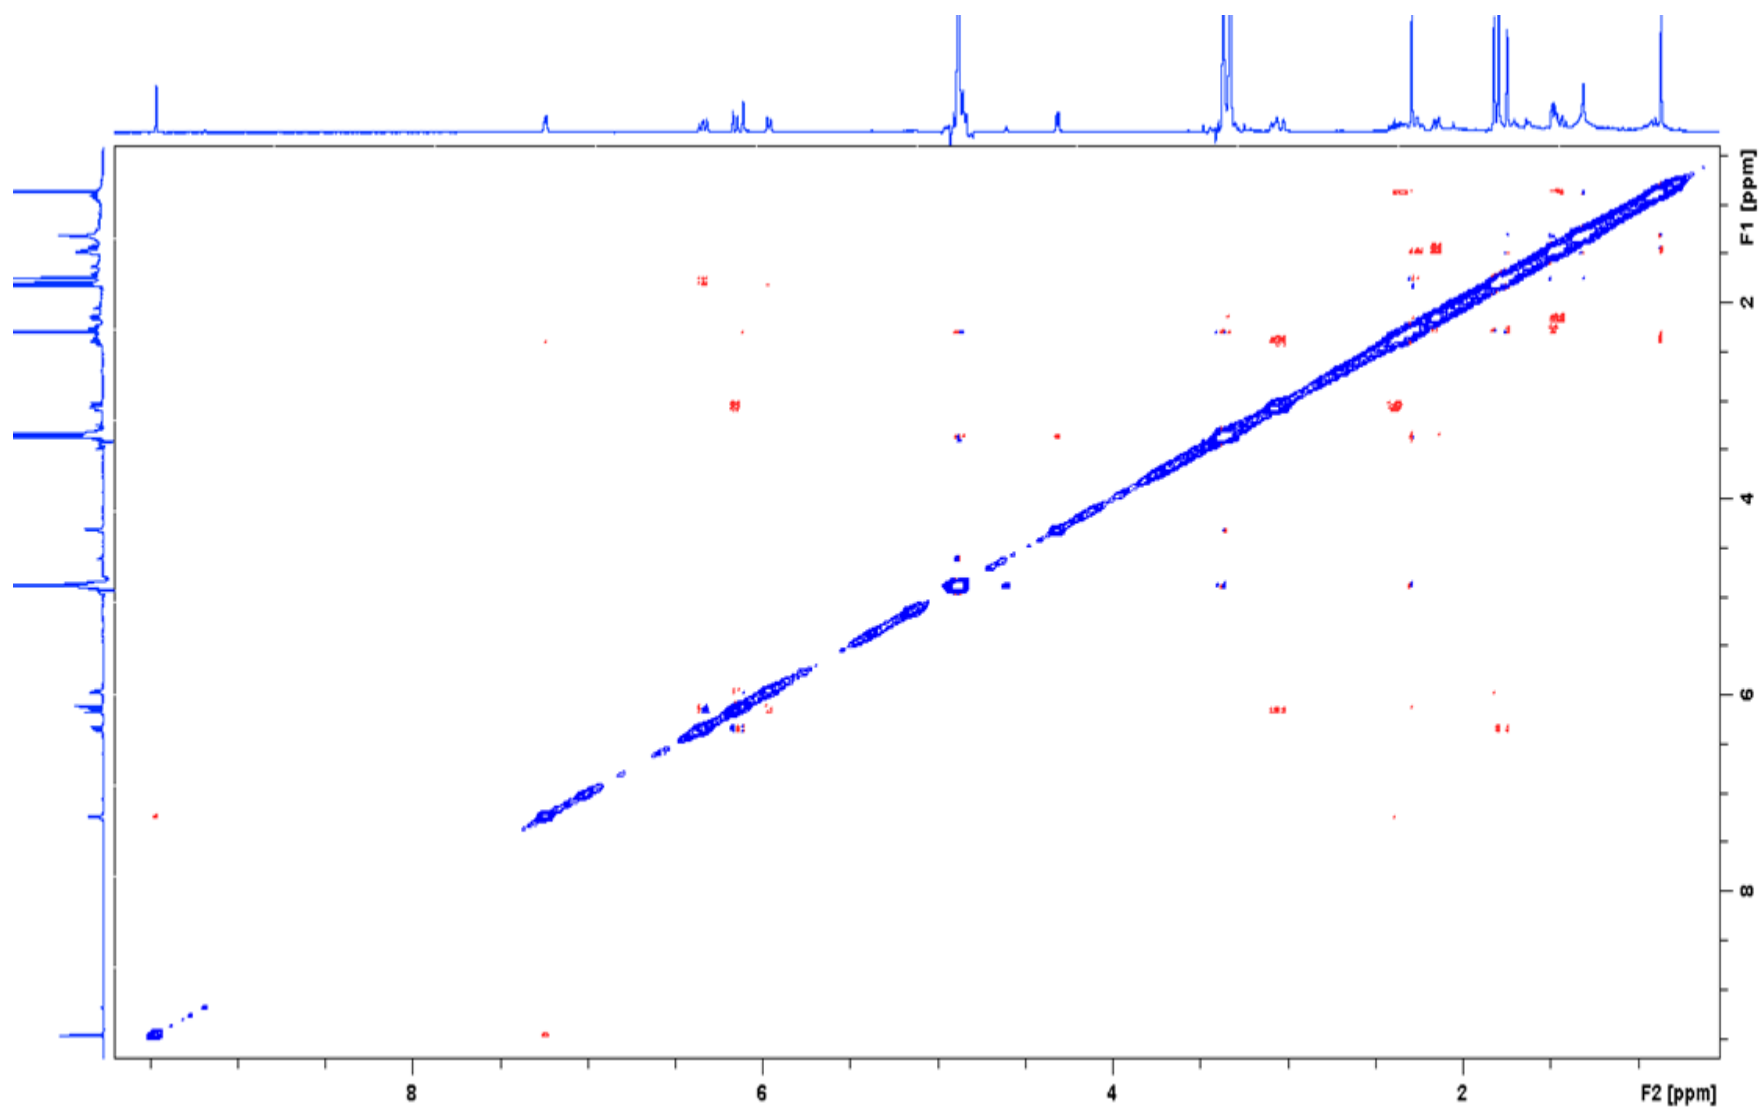

Figure S35. NOESY spectrum of 14,15-dehydro-(Z)-14-ophiobolin G (5).



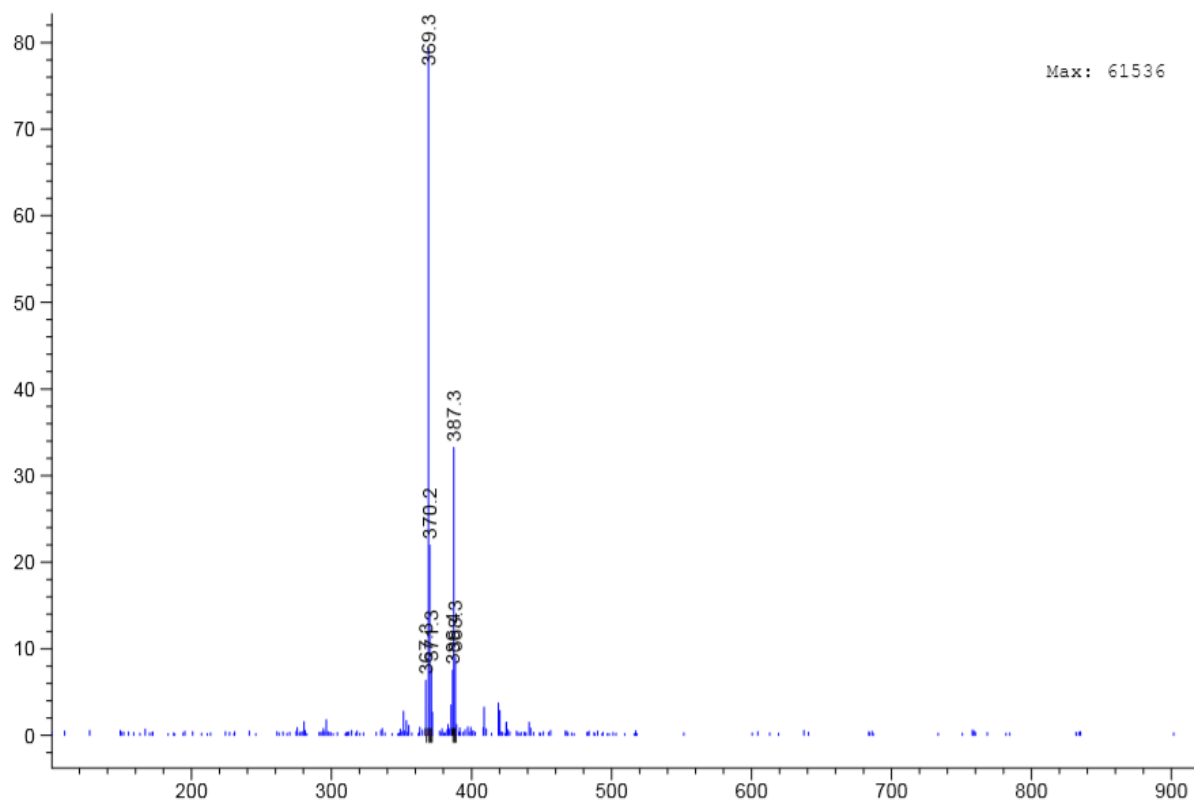

Figure S38. LRMS data of Ophiobolin C (7).

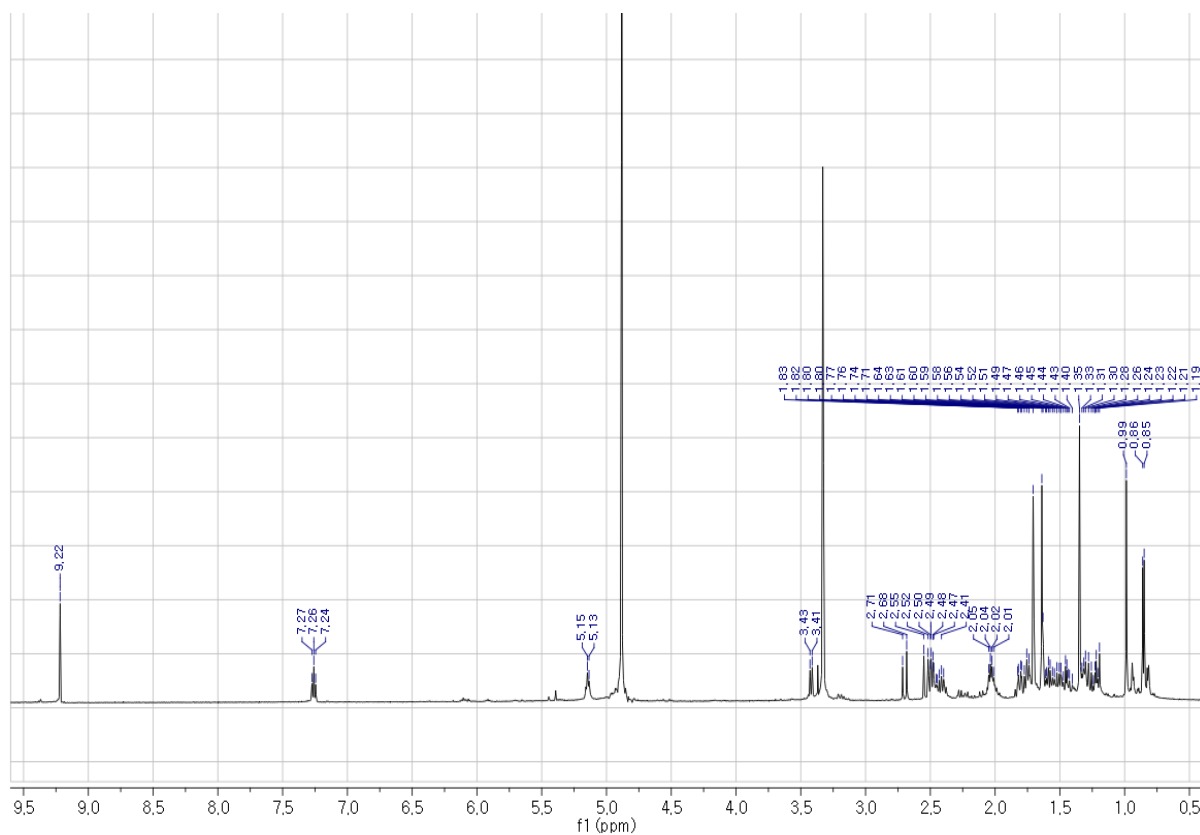

Figure S39.  $^1\text{H}$  NMR spectrum of Ophiobolin C (7).



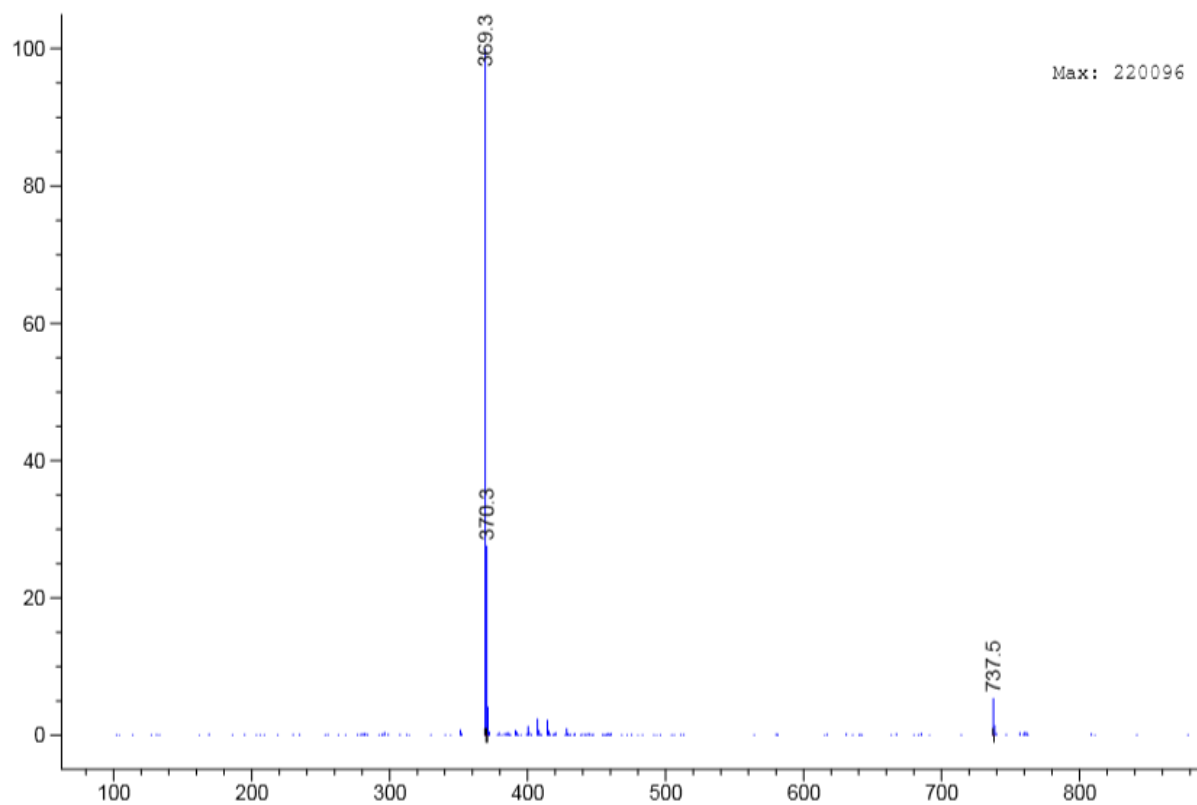

Figure S40. LRMS data of 6-epi-ophiobolin N (8).

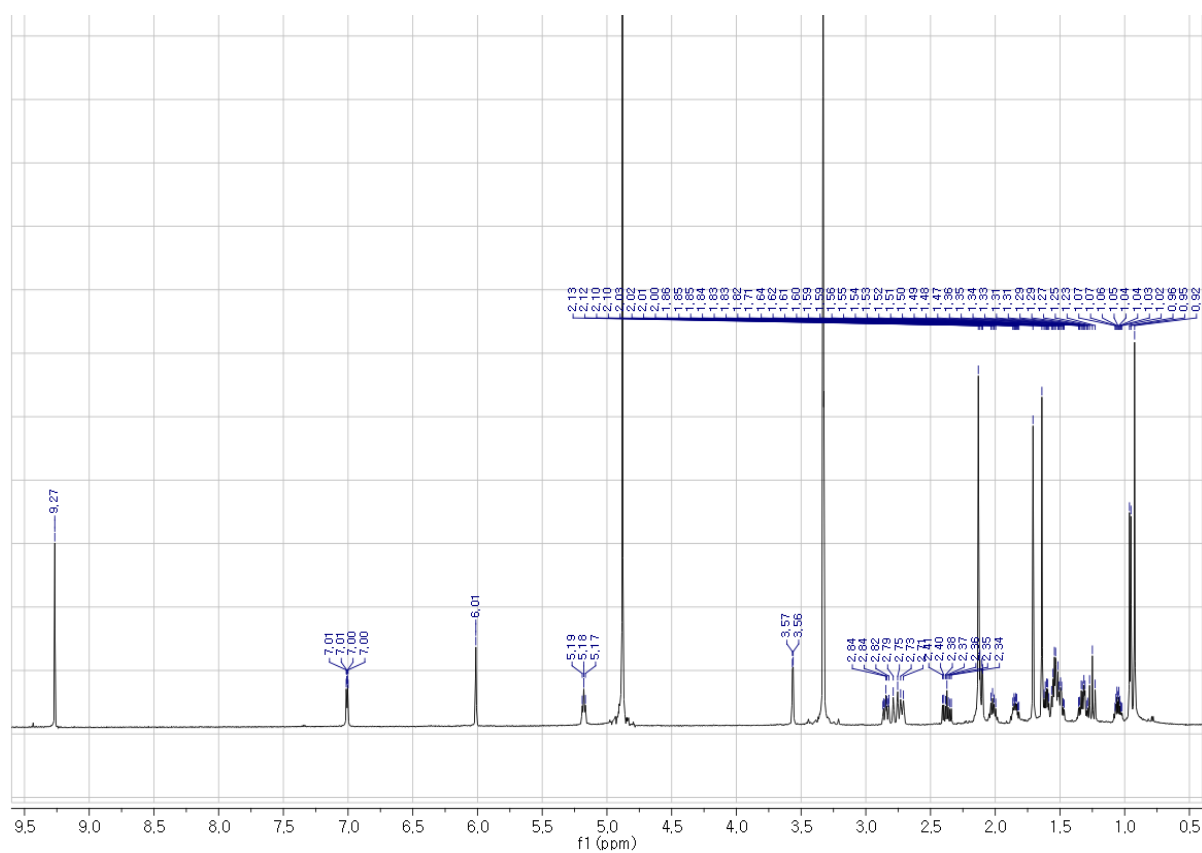

Figure S41. <sup>1</sup>H NMR spectrum of 6-epi-ophiobolin N (8).

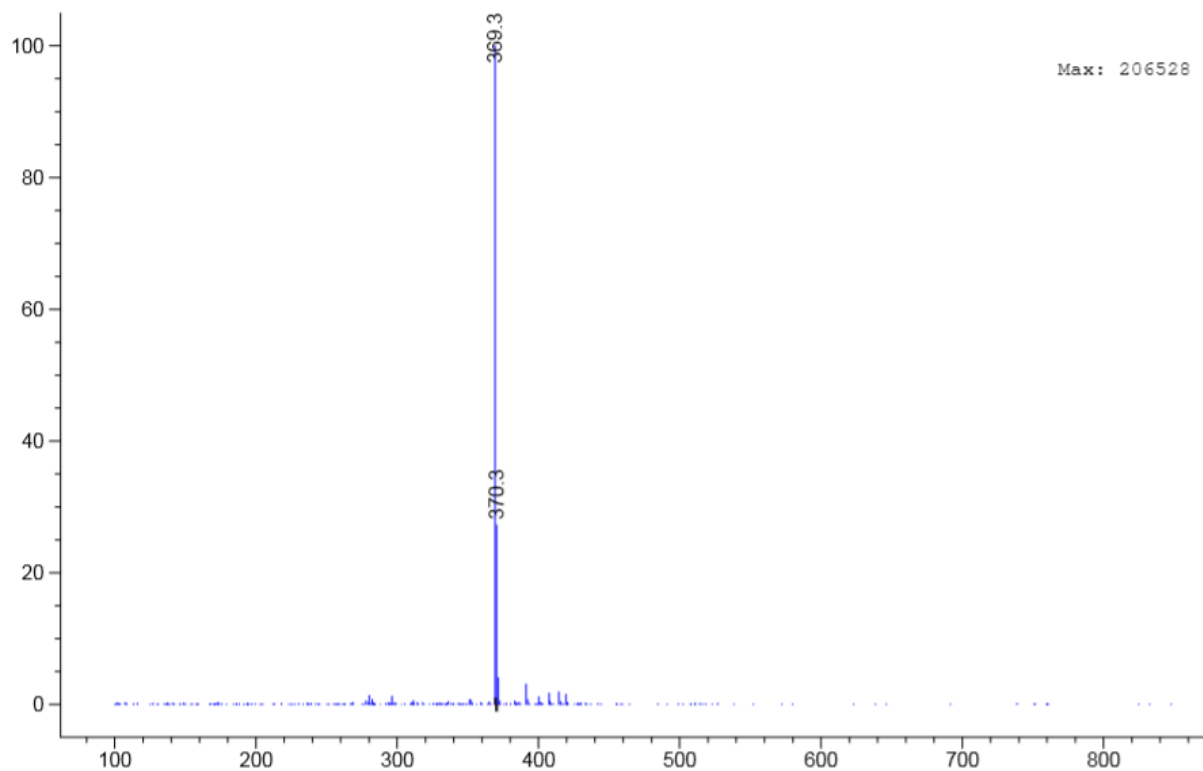

Figure S42. LRMS data of Ophiobolin N (9).

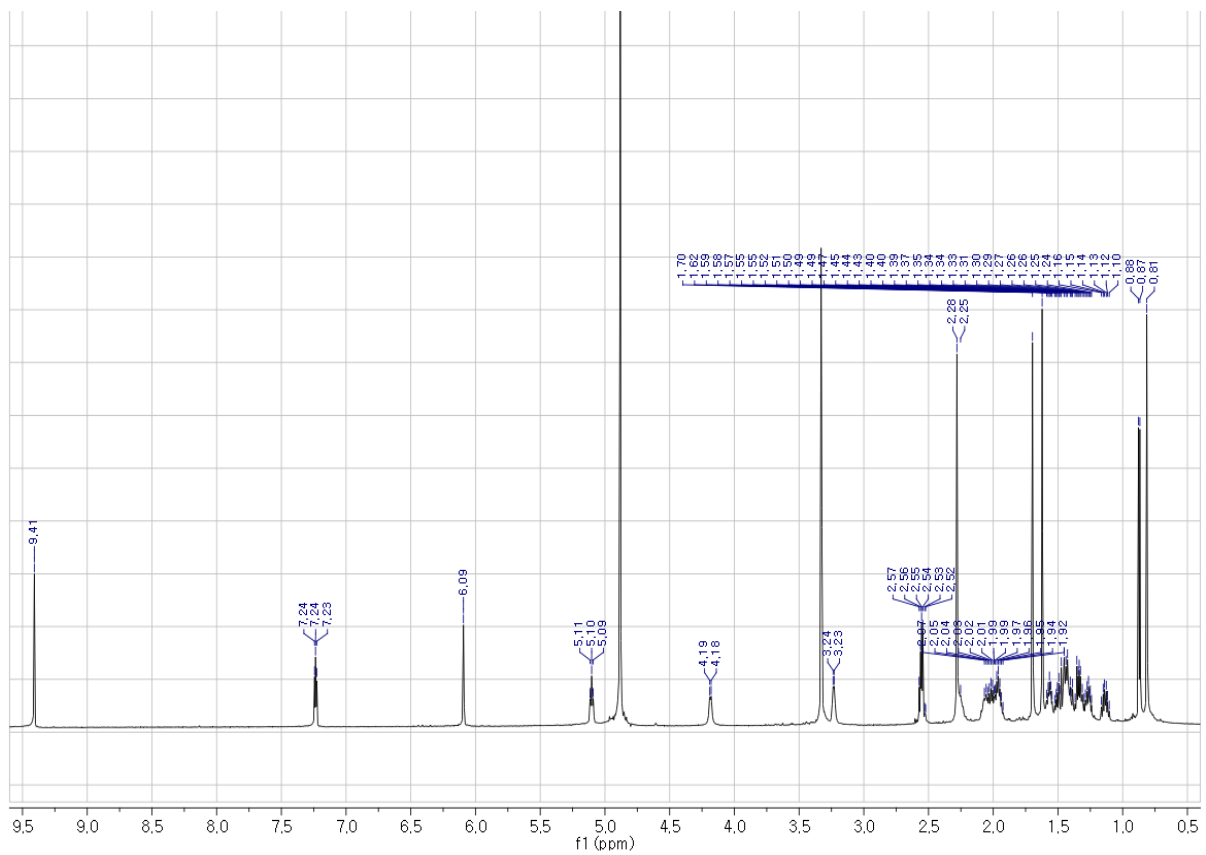

Figure S43.  $^1\text{H}$  NMR spectrum of Ophiobolin N (9).
